**Working Title:** Comparative genomic analysis of the pheromone receptor Class 1 family (V1R) reveals extreme complexity in mouse lemurs (genus, *Microcebus*) and chromosomal hotspots across mammals

**Authors:** Kelsie E. Hunnicutt<sup>1,8†</sup>, George P. Tiley<sup>1†</sup>, Rachel C. Williams<sup>1,2</sup>, Peter A. Larsen<sup>1,9</sup>, Marina B. Blanco<sup>3</sup>, Rodin M. Rasoloarison<sup>3,4</sup>, C. Ryan Campbell<sup>1</sup>, Kevin Zhu<sup>5</sup>, David W. Weisrock<sup>8</sup>, Hiroaki Matsunami<sup>5,7</sup> & Anne D. Yoder<sup>1\*</sup>

**Affiliations:**

<sup>1</sup>Department of Biology, Duke University, Durham, NC 27708, USA

<sup>2</sup>Duke Lemur Center, Duke University, Durham, NC 27705

<sup>3</sup>Behavioral Ecology and Sociobiology Unit, German Primate Centre, 37077 Göttingen, Germany

<sup>4</sup>Département de Biologie Animale, Université d'Antananarivo, BP 906, Antananarivo 101, Madagascar

<sup>5</sup>Department of Molecular Genetics and Microbiology, Duke University Medical Center, Durham, NC 27710

<sup>6</sup>Department of Biology, University of Kentucky, Lexington, KY 40506

<sup>7</sup>Department of Neurobiology, Duke Institute for Brain Sciences, Duke University Medical Center, Durham, NC 27710

<sup>8</sup>Current address: Department of Biological Sciences, University of Denver, Denver, CO 80208

<sup>9</sup>Current address: Department of Veterinary and Biomedical Sciences, University of Minnesota, Saint Paul, MN 55108

<sup>†</sup>Equal contributors

\*Author for Correspondence: Anne D. Yoder, Department of Biology, Duke University, Durham, USA, 919-660-7366, [anne.yoder@duke.edu](mailto:anne.yoder@duke.edu)

**Keywords (6):** V1r, vomeronasal system, pheromone, Lemuriformes, synteny, gene family

evolution

1 **Abstract**

2           Sensory gene families are of special interest, both for what they can tell us about  
3 molecular evolution, and for what they imply as mediators of social communication. The  
4 vomeronasal type-1 receptors (V1Rs) have often been hypothesized as playing a fundamental  
5 role in driving or maintaining species boundaries given their likely function as mediators of  
6 intraspecific mate choice, particularly in nocturnal mammals. Here, we employ a comparative  
7 genomic approach for revealing patterns of V1R evolution within primates, with a special focus  
8 on the small-bodied nocturnal mouse and dwarf lemurs of Madagascar (genera *Microcebus* and  
9 *Cheirogaleus*, respectively). By doubling the existing genomic resources for strepsirrhine  
10 primates (i.e., the lemurs and lorises), we find that the highly-speciose and morphologically-  
11 cryptic mouse lemurs have experienced an elaborate proliferation of V1Rs that we argue is  
12 functionally related to their capacity for rapid lineage diversification. Contrary to a previous  
13 study that found equivalent degrees of V1R diversity in diurnal and nocturnal lemurs, our study  
14 finds a strong correlation between nocturnality and V1R elaboration, with nocturnal lemurs  
15 showing elaborate V1R repertoires and diurnal lemurs showing less diverse repertoires.  
16 Recognized subfamilies among V1Rs show unique signatures of diversifying positive selection,  
17 as might be expected if they have each evolved to respond to specific stimuli. Further, a detailed  
18 syntenic comparison of mouse lemurs with mouse (genus *Mus*) and other mammalian outgroups  
19 shows that orthologous mammalian subfamilies, predicted to be of ancient origin, tend to cluster  
20 in a densely populated region across syntenic chromosomes that we refer to as V1R “hotspots.”  
21

## 22 **Introduction**

23           The evolutionary dynamics of sensory gene families are of fundamental interest as a  
24 model for how molecular evolutionary processes can shape the content and structure of genomes  
25 and for their ability to characterize the life history and ecological traits of organisms.

26 Vomeronasal type-1 receptor genes (V1Rs) comprise one such gene family and have been the  
27 subject of increasing interest in both the molecular genetics (e.g., Adipietro et al. 2012) and  
28 evolutionary genetics (e.g., Yohe and Brand 2018) communities. Vomeroolfaction is a form of  
29 chemosensation that mediates semiochemical detection and occurs in the vomeronasal organ  
30 (VNO) of mammals (Leinders-Zufall et al. 2000). V1Rs are expressed on vomeronasal sensory  
31 neurons in the VNO and have been demonstrated to detect pheromones in mice (Boschat et al.  
32 2002; Haga-Yamanaka et al. 2014). For example, impaired vomeronasal function in mice, either  
33 through a knockout of V1Rs or removal of the VNO, alters appropriate chemosensory behaviors  
34 such as conspecific avoidance of sick animals, interspecies defensive cues, male sexual behavior,  
35 and maternal aggression (Del Punta et al. 2002; Papes et al. 2010; Boillat et al. 2015). Thus, the  
36 evolution of V1Rs can have direct consequences for both the emitter and the receiver of  
37 pheromone signals, with ample evidence indicating that molecular evolution of V1Rs is  
38 associated with the speciation process (Lane et al. 2002; Kurzweil et al. 2009; Hohenbrink et al.  
39 2012; Nikaido et al. 2014).

40           V1Rs are ideally suited for study within the context of "sensory drive" wherein mate  
41 preferences in communication systems diverge in the face of novel environmental opportunity  
42 (Boughman 2002). Communication mechanisms for mate recognition have been recognized as  
43 an important component for driving rapid reproductive isolation (Mendelson 2003; Dopman et  
44 al. 2010; Servedio and Boughman 2017; Brand et al. 2019) and with the reinforcement of species

45 boundaries (Servedio and Noor 2003). Sensory drive can affect diverging populations in two  
46 ways by targeting the pheromone receptors and/or their signaling molecules. As examples,  
47 adaptation of a likely V1R signal in mice, androgen binding protein, is associated with  
48 assortative mating between *Mus musculus* subspecies (Karn et al. 2010; Chung et al. 2017; Hurst  
49 et al. 2017) just as fixation of nonsynonymous polymorphisms among V1Rs is associated with  
50 the speciation of *Mus spretus* and *Mus musculus* (Kurzweil et al. 2009). Moreover, it has been  
51 shown that differential expression of vomeronasal and olfactory receptor genes, including V1Rs,  
52 is associated with assortative mating in a pair of house mouse subspecies (Loire et al. 2017) and  
53 is likely reinforcing the subspecies along their hybrid zone.

54         The V1R gene family has experienced many duplications and losses in the evolutionary  
55 history of mammals, and the availability of duplicate copies can allow for divergence among  
56 sequences, gene expression, and ultimately function (e.g. Lynch and Conery 2000; Des Marais  
57 and Rausher 2008). Though not directly addressed in this study, it is worth noting that changes in  
58 gene expression often occur rapidly after gene duplication events (Makova and Li 2003; Keller  
59 and Yi 2014; Guschanski et al. 2017) and are often accompanied by shifts in rates of molecular  
60 evolution (Chen et al. 2010; Yang and Gaut 2011). Although the mechanisms that explain  
61 variable rates of molecular evolution, specifically the nonsynonymous to synonymous  
62 substitution rate ratio ( $dN/dS$ ), are complex, there is some interdependence on expression levels  
63 (O'Toole et al. 2018) and genome architecture (Dai et al. 2014; Xie et al. 2016). The V1R gene  
64 family demonstrates structural complexity (Ohara et al. 2009; Yohe et al. 2018), and gene family  
65 expansions and directional selection acting on duplicate copies may be important for the  
66 maintenance of species boundaries where vomerolfaction is linked with assortative mating (Luo  
67 et al. 2003; Isogai et al. 2011; Fu et al. 2015).

68           Here, we present a comparative genomic study of V1R evolution within the lemuriform  
69 primates, primarily focusing on the mouse lemurs of Madagascar (genus *Microcebus*). Mouse  
70 lemurs are perhaps the most species-rich clade of living primates (Hotaling et al. 2016), and are  
71 well-known for high levels of interspecific genetic divergence though with nearly uniform  
72 morphological phenotypes. They have thus come to be regarded as a classic example of a  
73 cryptic species radiation, perhaps related to their nocturnal lifestyle (Yoder et al. 2016). Mouse  
74 lemurs, and the closely-related dwarf lemurs, have elaborate olfactory communication behaviors  
75 that are associated with adaptive strategies such as predator recognition (Sündermann et al.  
76 2008), fecundity (Drea 2015), and even biased sex ratios (Perret 1996; Perret and Colas 1997).  
77 V1Rs take on particular interest in mouse lemurs as we hypothesize that their observed role in  
78 both speciation and in the maintenance of species boundaries within *Mus* may also apply to this  
79 speciose clade of primates (Smadja et al. 2015; Loire et al. 2017). We hypothesize that among  
80 primates, mouse lemurs will show signatures of sensory drive via genomic elaboration of the  
81 V1R complex and evidence of positive selection acting on V1R genes.

82           There are numerous lines of evidence to lead us to this hypothesis: 1) Previous studies  
83 have indicated that V1Rs within the lemuriform clade have evolved under pervasive positive  
84 selection 5/13/19 2:41:00 PM, 2) that the majority of gene copies are intact (Young et al. 2010;  
85 Larsen et al. 2014), and 3) that the differential expression of a large number of vomeronasal  
86 receptors in both the VNO and main olfactory epithelium of mouse lemurs are associated with  
87 different behaviors and chemical signals (Hohenbrink et al. 2014). In fact, along with murids,  
88 opossums, and platypus, mouse lemurs have been reported to have among the largest V1R  
89 repertoires found in mammals (Young et al. 2010). Even so, numerous obstacles such as  
90 complexities of chemical background, chemical signals, and the genetic basis of chemosensation

91 complicate both ecological and experimental approaches for differentiating between cause and  
92 effect in the speciation process (Yohe and Brand 2018). This is particularly problematic for  
93 studies of mouse lemurs given their remote geographic distribution, nocturnal life history, and  
94 endangered status. Thus, we take a comparative genomic approach for reconstructing the  
95 evolutionary dynamics of the V1R gene family within the small-bodied and nocturnal mouse and  
96 dwarf lemurs (family, Cheirogaleidae).

97

## 98 **A Comparative Genomic Approach**

99 V1R loci are highly repetitive and they, along with their surrounding regions, are  
100 notoriously challenging for genome assembly. Though previous studies have used targeted  
101 sequencing or short-read sequencing to examine the evolutionary dynamics of V1R expansions  
102 in a limited number of species (Young et al. 2010; Hohenbrink et al. 2012; Yoder et al. 2014),  
103 strepsirrhine primates have until recently remained woefully underrepresented in genomic  
104 databases (Perry et al. 2012; Meyer et al. 2015; Larsen et al. 2017; Hawkins et al. 2018). Here,  
105 we take advantage of the chromosome-level assembly of the gray mouse lemur, *Microcebus*  
106 *murinus*, along with short-read sequencing in related species, to characterize the V1R repertoires  
107 for lemuriform primates. Recent improvements using long-read sequencing of the mouse lemur  
108 genome (Larsen et al. 2017) improve our ability to characterize the V1R repertoire (Larsen et al.  
109 2014) and allow for comparisons of the genomic architecture of V1R-containing regions in  
110 expanded and contracted V1R repertoires across mammals.

111 In this study, we have sequenced and assembled seven new cheirogaleid genomes, with a  
112 particular focus on the mouse lemurs. Further, to explore intraspecific copy number variation and  
113 evaluate the effects of assembly error on V1R repertoire counts, we resequenced and *de novo*

114 assembled genomes from eight *M. murinus* individuals from a captive breeding colony. Our  
115 study thus serves as a timely companion to two recent overviews of comparative genomic studies  
116 for illuminating the evolutionary and life-history dynamics of chemosensory gene family  
117 evolution in vertebrates (Bear et al. 2016; Hughes et al. 2018). A comparative genomic approach  
118 allows us to explore classic predictions of gene-family evolution, namely, that genomic drift can  
119 operate at very fine scales to produce high intraspecific copy number variation (Nozawa et al.  
120 2007) and that gene-family evolution is often marked by a strong birth-death process over  
121 phylogenetic time scales (Nei et al. 1997; Csűrös and Miklos 2009; Hughes et al. 2018). The  
122 latter question is of particular interest for V1R evolution given that adaptive pressures on these  
123 genes makes them highly vulnerable to pseudogenization in cases of relaxed selection, thus  
124 yielding the observed correlations between levels of V1R ornamentation and diverse adaptive  
125 regimes. An overview of primates shows that those with elaborate representation of subfamilies  
126 have a strong reliance on chemosensory communication whereas those with depauperate V1R  
127 representation rely on alternative mechanisms for inter- and intra-specific communication (Yoder  
128 and Larsen 2014).

129         These new genomic resources have also allowed us to address a number of questions  
130 regarding rates of molecular evolution in V1Rs. Divergent gene function following gene  
131 duplication predicts that some signature of positive selection should be evident in the gene  
132 sequences (Zhang et al. 1998), but it remains unknown if selection has acted pervasively over  
133 time or has occurred in episodic bursts prior to the diversification of mouse lemurs. We might  
134 anticipate episodic positive selection to be the primary mechanism if purifying selection has been  
135 operating at more recent time scales to preserve gene function among duplicate copies. For  
136 strepsirrhine primates (i.e., the lemurs and lorises), pervasive positive selection has been detected



137 at the interspecific level (Hohenbrink et al. 2012; Yoder et al. 2014), while strong purifying  
138 selection has been found within populations. Here we disentangle pervasive versus episodic  
139 positive selection among V1Rs and show that both gene duplication and rates of molecular  
140 evolution have been active in shaping expanded V1R repertoires among the dwarf and mouse  
141 lemurs. Moreover, through comparison with *Mus* and other mammals, we show that orthologous  
142 subfamilies tend to cluster in a densely populated region on syntenic chromosomes that we refer  
143 to as V1R "hotspots."

144

## 145 **Results and Discussion**

### 146 **Novel genome assemblies of several strepsirrhine primates**

147       We *de novo* assembled seven novel strepsirrhine genomes: *Microcebus griseorufus*, *M.*  
148 *ravelobensis*, *M. mittermeieri*, *M. tavaratra*, *Mirza zaza*, *Cheirogaleus sibreei* and *C. medius*.  
149 These efforts have doubled the number of publicly available genomes for the Strepsirrhini with a  
150 specific focus on the dwarf and mouse lemur clade. Excluding *C. medius*, the seven genomes  
151 were sequenced to an average depth of coverage between 26x and 45x with scaffold N50s of 17-  
152 76kb (Supplementary Table S1). The *C. medius* reference genome was assembled using Dovetail  
153 Genomics to an average depth of coverage of 110x and a scaffold N50 of approximately 50Mb  
154 (Williams et al. 2019). We evaluated assembly completeness using the Benchmarking Universal  
155 Single-Copy Orthologs tool, BUSCO (Simão et al. 2015), which assesses genomes for the  
156 presence of complete near-universal single-copy orthologs (Supplementary Figure S1). The  
157 assemblies recovered between 77.2% and 92.3% of the mammalian BUSCO gene set. We also  
158 resequenced eight *M. murinus* individuals, with one duplicate individual (Campbell et al. 2019),  
159 and here have *de novo* assembled genomes for each individual with 21x-29x effective coverage

160 using the 10x Genomics Supernova pipeline. The additional scaffolding information provided by  
161 the 10x Genomics linked-reads resulted in scaffold N50s of 0.6-1.2 Mb. BUSCO analyses  
162 revealed that the resequenced assemblies recovered between 89.9% and 95.5% of the  
163 mammalian gene set. A denser sampling of genomes within Cheirogaleidae not only provides an  
164 opportunity for illuminating patterns of V1R gene family evolution but also promotes greater  
165 understanding of the molecular evolution of primate and strepsirrhine-specific genomes. Genome  
166 resequencing of *M. murinus* individuals has allowed investigation of intraspecific V1R copy  
167 number variation as well as questions regarding microevolutionary processes and gene family  
168 evolution (Park et al. 2011).

169         The monophyletic genus *Microcebus* contains 24 named species (Hotaling et al. 2016),  
170 and our results clearly demonstrate that the clade has a uniquely complex V1R repertoire  
171 compared to other primates thus far characterized (Figure 1A and B). Contrary to a previous  
172 study suggesting that V1R expansion is ubiquitous across the lemuriform clade (Yoder et al.  
173 2014), increased sampling reveals that expansion has been profound in the nocturnal dwarf and  
174 mouse lemurs. This is consistent with the original hypothesis that local V1R expansions may  
175 play a role in forming or maintaining speciation boundaries within *Cheirogaleus* and *Microcebus*  
176 as might be predicted given their nocturnal lifestyle. Phylogenetic analyses revealed that  
177 expanded V1R repertoires in mouse lemurs demonstrate a remarkably higher rate of duplicate  
178 gene retention in comparison to other primates (Figure 1A and B; Table 1). The common  
179 ancestor of mouse lemurs is not associated with novel subfamily birth though the diversity and  
180 number of V1R gene copies is striking (Figure 1A; Table 1). Although genomes generated  
181 exclusively from short-read data are vulnerable to collapsing loci in assemblies (Larsen et al.  
182 2014), our inference of increased V1R retention in *M. murinus* relative to non-cheirogaleid

183 primates was robust to assembly strategies and data sources (Supplementary Table S2). Further,  
184 the resequenced *M. murinus* individuals reveal low intraspecific variation in copy number  
185 (Figure 2), suggesting that the observed differences in repertoire size between mouse lemurs and  
186 other non-nocturnal lemurs is not an artifact of individual sampling or assembly error (Figure 3).

187         The expansion dynamics of V1Rs within Cheirogaleidae do not support a simple linear  
188 correlation between species richness and repertoire size. Although all cheirogaleid repertoires  
189 had full primate subfamily membership, there was variation in subfamily proportions between  
190 species, which is consistent with our hypothesis that species-specific V1R repertoires and  
191 chemosensation may be important for species diversity of cheirogaleids in comparison to diurnal  
192 strepsirrhines. Dwarf lemurs, genus *Cheirogaleus*, are hypothesized to have as many as 18  
193 species (Lei et al. 2014) though have the smallest V1R repertoires within the cheirogaleids  
194 examined here. Conversely, the genus *Mirza*, with only two recognized species, has a repertoire  
195 size that is nearly equal to that of *Microcebus murinus*. It is notable, however, that the *Mirza*  
196 genome's expanded repertoire is primarily enriched for subfamily III (Figure 1A). The  
197 differential subfamily enrichment among species suggests that despite the similarity in size to  
198 *Microcebus* repertoires, the V1R repertoire of *Mirza* has experienced independent selective  
199 pressures on gene retention and may ultimately fulfill a different functional role compared to  
200 *Microcebus*.

201

## 202 **V1R repertoire estimation across primates**

203         We estimated V1R repertoire size evolution across strepsirrhine primates as well as for  
204 several well-annotated primate and mammalian genomes for outgroup comparison. Notably,  
205 repertoire estimates of extant primates are comparable to previous studies that used trace archive

206 fragments and earlier draft genome versions (Figure 3; Supplemental Table S2; Young et al.  
207 2010; Moriya-Ito et al. 2018). The expanded V1R repertoire within the gray mouse lemur is not  
208 ubiquitous across the Strepsirrhini, however. Rather, repertoire size expanded gradually from a  
209 reduced set in the strepsirrhine common ancestor to its peak in the mouse lemur clade. This  
210 expansion is characterized by a reduced repertoire in the early diverging aye-aye lineage (genus  
211 *Daubentonia*), moderate repertoires among diurnal lemurs, and an expansion that likely occurred  
212 in the common ancestor of Cheirogaleidae (Figure 3). If the origins of many V1R copies in  
213 mouse lemur date to the Cheirogaleidae common ancestor, this means that at least some of those  
214 duplicates have remained functional and intact since their origins 30 million years ago, as would  
215 be consistent with divergence time estimates for the cheirogaleid radiation (Yang and Yoder  
216 2003; dos Reis et al. 2018).

217         Within Cheirogaleidae, repertoire sizes ranged from a low of 58 intact V1Rs in *C. medius*  
218 to highs between 102-143 intact V1Rs in the genus *Microcebus*. The mouse lemurs have  
219 universally large V1R repertoires (102-146 intact genes) with notable intragenus variation. Prior  
220 to this study, *M. murinus* had been identified as having one of the largest V1R repertoires within  
221 mammals (Young et al. 2010). Additional sampling from *Microcebus* reveals, however, that  
222 among the five mouse lemur species here characterized, *M. murinus* actually has the smallest  
223 repertoire with only 102 intact V1Rs. We also estimated the percent of intact V1Rs contained  
224 within the total repertoire for each species. Most haplorrhine primates (Anthropoidea plus  
225 *Tarsius*) species have repertoires with low percentages of intact receptors (<37% intact). Within  
226 Lemuroidea, the diurnal lemurs also have small and pseudogenized repertoires (26% to 49%  
227 intact) containing only 22-27 intact V1Rs. In contrast, among nocturnal species excluding aye-

228 aye, we observe intact repertoires between 58% to 66% within Cheirogaleidae, and 61% for the  
229 nocturnal loriform *Otolemur garnetti*.

230         These comparisons do not, however, provide definitive evidence that expanded V1R  
231 repertoires in primates are strictly associated with nocturnal life history (Wang et al. 2010;  
232 Moriya-Ito et al. 2018). Although *Otolemur garnetti* shows a proportion of intact V1R copies  
233 similar to dwarf and mouse lemurs (Figure 3), subfamilies VII and IX are absent from *O.*  
234 *garnetti* (Figure 1B). By comparison, the genomes of both the aye-aye and the tarsier (Schmitz et  
235 al. 2016) contain low numbers of intact V1R gene copies, which appears to contradict the  
236 hypothesis that a nocturnal life history alone is sufficient for explaining V1R elaboration in  
237 mouse lemurs. Though it is true that both aye-aye and tarsier have more V1R copies than the  
238 diurnal primates compared here, they also show a high proportion of putative pseudogenes and  
239 an absence of some V1R subfamilies found in Cheirogaleidae (Figure 1A and B).

240         Our phylogenetic approach reveals a pattern of gene family evolution compatible with  
241 active gene birth and death (Nei et al. 1997; Csűrös and Miklos 2009; Hughes et al. 2018) with  
242 an independent V1R expansion isolated to Cheirogaleidae with three subfamily gains rather than  
243 a single more ancient expansion followed by losses in diurnal lineages (Table 1). Although the  
244 gain and loss dynamics of V1Rs over time is complex with uncertainty in the origins of specific  
245 subfamilies, variation in subfamily membership among species suggests that nocturnal primates  
246 possess more diverse repertoires than their diurnal counterparts (Figure 1A and B). These results  
247 are suggestive of an association between nocturnal life histories and V1R repertoire evolution, as  
248 well as the importance of chemosensation generally among nocturnal primates. Our findings are  
249 not conclusive, however, as the pattern observed in aye-aye deviates from this expectation,  
250 though it must be noted that the quality of the aye-aye genome assembly is considerably poorer

251 than the others compared with the lowest contig/scaffold N50 and most incomplete BUSCO  
252 results (Supplementary Figure S1 and Table S1). An improved genome for aye-aye, a notably  
253 solitary primate (Sterling and Richard 1995), as well as genomes for species within the diurnal  
254 nest-dwelling genus, *Varecia*, will allow for more formal tests of how life history traits are  
255 correlated with V1R copy number.

256  
257

### 258 **Subfamily membership and ancestral repertoire reconstruction**

259

260 For each genome analyzed, we classified repertoire subfamily membership based on  
261 homology inferred from a maximum likelihood (ML) tree (Figure 4) and previously-described  
262 subfamily designations (Hohenbrink et al. 2012). During alignment, sequences that introduced  
263 excessive gaps to transmembrane regions were iteratively removed, resulting in alignments of  
264 increasing conservatism (see Materials and Methods “V1R repertoire estimation and ancestral  
265 count reconstruction”). We tested whether these varying alignments affected our estimates of  
266 subfamily composition and found little impact. Regardless of the number of sequences removed  
267 from the alignment, the relative proportions of subfamily membership within each species  
268 remained constant (Supplementary Figure S2). Although topological errors may contribute to  
269 uncertainty in gene count reconstructions, the ML tree shows 70% or greater bootstrap support  
270 for 63% of nodes (Figure 4), with little additional improvement possible due to the limitations of  
271 a single-exon gene family (Supplementary Table S3). Our results suggest that both the ancestral  
272 primate and the ancestral lemur had repertoires more limited in size and diversity than many  
273 living strepsirrhine primates, further supporting the controversial hypothesis that the ancestral  
274 primate was diurnal rather than nocturnal (Tan et al. 2005; Borges et al. 2018).

275 Subfamily membership varies among the other extant strepsirrhines examined (Figure 1A  
276 and B). While *Otolemur garnetti* contains a very diverse repertoire, it lacks subfamily VII and IX  
277 membership. The diurnal lemurs lack receptors belonging to a few subfamilies, most consistently  
278 IV, VIII, and IX. The basal lineage within the lemuriform radiation, *Daubentonia*  
279 *madagascariensis*, lacks membership for most subfamilies, including *Strep*/I, II, IV, V, and VII.  
280 Subfamily I, referred to as “V1R*strep*” in Yoder et al. (2014), is used synonymously here for  
281 distinction from the mouse subfamily “I”. The repertoires of cheirogaleids are highly enriched  
282 for subfamily III, V, and IX membership, while the diurnal lemurs are enriched for subfamilies  
283 *Strep*/I, II, and III. In haplorrhine primates, repertoires contain only one or a few subfamilies.  
284 Ancestral state reconstruction with asymmetric parsimony (Csűrös and Miklos 2009; Csűrös  
285 2010) revealed that the stem primate possessed only a subset of now extant V1R subfamilies,  
286 *Strep*/I, II, III, IV and VIII (Figure 1B). Subfamily IX has undergone a notable expansion in  
287 Cheirogaleidae, but the aye-aye repertoire also contains members from subfamily IX thus,  
288 subfamily IX is the only subfamily exclusive to nocturnal strepsirrhines, despite its absence in  
289 *Otolemur garnetti* (Figure 1A and B).

290

### 291 **Copy number variation in intraspecific *Microcebus murinus* repertoires**

292

293 We resequenced eight *M. murinus* individuals of known pedigree from the colony at the  
294 Duke Lemur Center in Durham, North Carolina. Using these genomes, we estimated  
295 intraspecific variation in V1R repertoire size (Figure 2). For the eight resequenced *M. murinus*  
296 individuals, we observed low levels of intraspecific V1R repertoire size variation relative to size  
297 variation between taxonomic families with individual repertoires ranging from 86 to 105 intact  
298 V1R loci. Though one might expect that levels of intraspecific variation in V1R repertoire size in

299 a captive population may be reduced relative to wild populations of *M. murinus*, the colony at the  
300 Duke Lemur Center shows signs of admixture from two distinct evolutionary lineages, *M.*  
301 *murinus* and *M. ganzhorni* (Larsen et al., 2017), presently recognized as distinct species  
302 (Hotaling et al., 2016). Therefore, the intraspecific variation observed here may actually be  
303 exaggerated, rather than reduced, which increases our confidence in the robustness of repertoire  
304 size estimates among species through sampling of single individuals. To test for the potentially  
305 confounding effects of sequencing and assembly error, one individual, DLC7033, was sequenced  
306 twice as a technical replicate. The duplicate genome assemblies respectively contained 92 or 96  
307 intact loci indicating that sequencing and assembly error likely play a measurable role in  
308 generating variation among observed repertoire counts, though the effect appears to be modest.  
309 Thus, taking the results of the pedigree analysis as largely accurate, this emphasizes the highly  
310 dynamic nature of V1R repertoire size evolution, even over generational timescales.

311

### 312 **Complex history of diversifying positive selection in the dwarf and mouse lemurs**

313 Our results agree with previous studies in finding that selection has acted pervasively  
314 across the V1R gene family over time (Hohenbrink et. al. 2012). Pervasive positive selection was  
315 revealed for all subfamilies identified in this study, even when analyzing the genus *Microcebus*  
316 alone (Supplementary Tables S4 and S5) and additional genome sequences for dwarf and mouse  
317 lemurs have likely increased the power of the sites tests. For example, positive selection was not  
318 evident for subfamily VII in a previous study limited to only *Microcebus murinus* (Hohenbrink  
319 et al. 2012). Furthermore, some subfamilies have unique profiles of sites under selection (Figure  
320 5). Although lineage-specific rate variation is a confounding factor in V1R gene family evolution



321 (Yoder et al. 2014), our analyses, spanning a range of taxon sampling schemes, show that our  
322 ability to characterize the V1R selection profiles are robust to such rate variation (Figure 5).

323 We performed two different model comparisons to differentiate between hypotheses of  
324 neutrality versus selection, and for the latter, for differentiating between the effects of rate  
325 constancy versus heterogeneity among sites. The M7 and M8 model comparisons always  
326 recovered more sites under selection than the more conserved M1a and M2a comparisons, but  
327 individual sites under selection detected by Bayes empirical Bayes with M2a were subsets of  
328 those detected by M8. Both model comparisons use likelihood ratio tests (LRTs) to detect  
329 positive selection and assume  $dN/dS$  is constant across branches, but the M2a and M1a  
330 comparison (Zhang et al. 2005) uses three finite mixtures of  $dN/dS$  while the M8 and M7  
331 comparison (Yang et al. 2000) accounts for heterogeneity in  $dN/dS$  among nearly neutral sites  
332 with a beta distribution. Tests of pervasive positive selection were also performed on data  
333 realigned by subfamily, and similar estimates of proportions of sites under positive selection  
334 suggested that our site models were not misled by alignment errors (Supplementary Tables S6  
335 and S7). Most individual sites under positive selection are unique to different subfamilies  
336 (Supplementary Figure S3) and reflect biases in selective pressures across different loop and  
337 transmembrane domains (Supplemental Figure S4). However, some selection profiles were more  
338 differentiated than others, such as *Strep*/I, II, V, and IX (Figure 5). The divergent selection  
339 profiles among subfamilies leads us to interpret positive selection acting on V1R genes in  
340 primates to be largely diversifying. Differentiated selection profiles among subfamilies are  
341 explained by biases among transmembrane and loop domains (Supplementary Material;  
342 Supplementary Figure S5; Supplementary Tables S8-S10).

343 Previous studies have indicated that extracellular loops have been primary targets of  
344 positive selection in V1Rs (Hohenbrink et al. 2012), and our results agree with these findings.  
345 Positive selection acting on extracellular loops two and three from Hohenbrink et al. (2012),  
346 identified here simply as loops three and five respectively, is evident (Supplementary Figure S5).  
347 These specific domains are probable regions where V1Rs bind to semiochemicals (Hohenbrink  
348 et al. 2012). Our results also show the transmembrane domains themselves, whether directly or  
349 by linkage, have also been under variable levels of positive selection (Supplementary Material;  
350 Supplementary Table S8). We find limited evidence for an enriched number of sites under  
351 positive selection in transmembrane domains four and five, and a depletion in transmembrane  
352 domain three, which have been previously predicted to form the ligand binding pocket of V1Rs  
353 (Kobilka et al. 1988; Pilpel and Lancet 1999; Palczewski et al. 2000; Yoder et al. 2014). These  
354 results prompt us to hypothesize that pervasive diversifying positive selection has accompanied  
355 selection for divergent function among V1R subfamilies, although additional evidence is needed  
356 for hypothesis testing.

357 Branch-site models detected evidence of episodic positive selection in the evolution of all  
358 V1R subfamilies except for lemur VIII (Supplementary Figure S6; Supplementary Table S11).  
359 Tests of episodic positive selection across the V1R subfamilies in the house mouse have been of  
360 little interest (Karn et al. 2010) and our tests of episodic selection here are generally not  
361 associated with the expansion of V1Rs in dwarf and mouse lemurs. However, subfamily IX  
362 would be a candidate for further investigation, given that it was the only subfamily to show  
363 notable levels of episodic positive selection, and is the only subfamily specific to nocturnal  
364 strepsirrhines. Further, many of the sites identified to be under positive selection correspond to  
365 the previously identified ligand binding domains (Supplementary Figure S6, Supplementary

366 Table S12). Exploration of alternative topologies revealed that branches showing episodic  
367 positive selection were likely not due to topological errors (Supplementary Material;  
368 Supplementary Figure S6).

369

### 370 **Comparative evolution of V1R repertoires and genome architecture across Mammalia**

371 Here we take advantage of the recently published chromosome-level assembly for *M.*  
372 *murinus* and other chromosome-level mammalian assemblies in an effort to identify genomic  
373 features that are generally associated with V1R expansion. The molecular environment of V1Rs  
374 is predicted to play a role in their regulation and has previously been studied only in mouse, rat,  
375 and pig (Lane et al. 2002; Stewart and Lane 2007; Kambere and Lane 2009; Michaloski et al.  
376 2011; Dinka and Le 2017). We compared the expanded V1R repertoires of mouse and mouse  
377 lemur with the putatively contracted V1R repertoires of horse, cow, dog, and human. As  
378 predicted from previous studies (Kambere and Lane 2007; Kambere and Lane 2009), enrichment  
379 for repetitive LINE elements is associated with expansion of V1Rs in mammals (Supplementary  
380 Figure S7). We find that mouse lemur V1Rs primarily cluster by subfamily at chromosomal  
381 locations across the genome as is also characteristic of the V1R repertoire in mouse. Only mouse  
382 lemur subfamily VIII does not form a cluster but is instead uniquely dispersed across three  
383 different chromosomes (Figure 6). We also analyzed the locations of all regions demonstrating  
384 V1R homology to determine if there are any potential pseudogenized subfamilies or clusters in  
385 the genome and found no evidence for pseudogenized clusters of V1Rs in mouse lemur  
386 (Supplemental Figure S12). Both LINE enrichment and physical clustering of V1R loci have  
387 been predicted to be associated with proper regulation of V1Rs (Lane et al. 2002; Kambere and  
388 Lane 2007) and may be characteristic of expanded V1R repertoires in general.

389 To investigate whether homologous subfamilies have retained chromosomal synteny in  
390 species with expanded repertoires and across mammals broadly, we evaluated chromosomal  
391 synteny for each species relative to mouse using the SynChro software (Drillon et al. 2014;  
392 Figure 6, Figure 7A and B, Supplementary Figures S8-S11). In mouse and mouse lemur, most  
393 homologous V1R subfamilies retain chromosomal synteny (Figure 6, Figure 7A and B). Mouse  
394 subfamily D is most closely related to mouse lemur subfamily IV, and both subfamilies share  
395 mouse chromosome 7 synteny. Subfamilies J/K and V as well as subfamilies G and *Strep*/I also  
396 share mouse chromosome 7 synteny. Lemur subfamily III is syntenic with mouse E and F on  
397 mouse chromosomes 6 and 7. Lemur subfamilies VI and VII are syntenic with mouse  
398 subfamilies H and I on chromosome 13. Lemur subfamilies not sharing synteny with any mouse  
399 subfamily include subfamilies II, VIII, and IX. The expanded subfamilies in Cheirogaleidae, IV,  
400 VII, and IX, all map to different chromosomal regions of the *M. murinus* genome and were not  
401 linked on an ancestral syntenic block based on comparisons between *M. murinus* and mouse.  
402 Therefore subfamily expansions have occurred independently and not as tandem duplications of  
403 a single genomic region.

404 Interestingly, when comparing all mammalian species examined, our results reveal that in  
405 each species, one chromosome contains a very dense block of highly homologous subfamilies on  
406 a backbone of mouse chromosome 7 synteny, referred to here as “V1R hotspots” (Figure 7B).  
407 These hotspots usually contain receptors of the EF/III, D/IV, JK/V, and *Strep*/G subfamilies, and  
408 cluster order is maintained with a few species-specific subfamily deletions. The chromosomal  
409 synteny of the "hotspots" is rarely interrupted, and if interrupted, it is almost exclusively  
410 interrupted by a stretch of synteny from another mouse chromosome containing V1Rs. These  
411 interleaving regions in hotspots are usually chromosome 13 or 17, indicating that genomic

412 regions where V1Rs cluster are also subject to increased gene duplication rates. Interestingly, the  
413 only putative intact members of the contracted human V1R repertoire are also contained within  
414 this "hotspot" location and share homology with hotspot subfamilies.

415 Previous studies of Laurasiatheria have predicted that the V1R repertoires of cow, horse,  
416 and dog consist mostly of highly orthologous loci with evolutionary conserved functions (Yohe  
417 et al. 2018). While conserved function remains to be shown experimentally, retained synteny of  
418 these Laurasiatherian V1Rs within hotspots across Mammalia supports the hypothesized ancient  
419 origin of these subfamilies and reinforces the idea that V1Rs in these subfamilies are orthologous  
420 in function (Ohara et al. 2009; Yohe et al. 2018). Mouse lemur V1Rs show striking structural  
421 similarities to the functionally diverse repertoire of mouse and considering the independent gains  
422 in copy number and novel subfamily evolution, coupled with variable rates of molecular  
423 evolution and selective pressures, V1Rs in mouse lemurs may serve as an ideal system for  
424 elucidating pheromone evolution in primates. Similar patterns of deep synteny have been  
425 described for ~80 My of odorant receptor evolution in bees (Brand and Ramirez 2017).

426 Considered in this context, our results suggest that chemosensory gene family evolution may  
427 follow similar molecular "rules" in organisms with vastly different natural histories, even when  
428 evolved independently from different ancestral gene families, as would be the case comparing  
429 mammals to insects.

430

## 431 **Conclusions**

432 We revealed that an expansion of the V1R gene family is shared across the dwarf and  
433 mouse lemurs, and that duplicate V1R gene copies have been evolving under strong selective  
434 pressures. Divergent patterns of molecular evolution among V1R subfamilies and diversity in

435 subfamily membership and abundance suggests that VIRs may serve as a test case for studying  
436 the evolution of sensory drive in primates. Pheromone detection among nocturnal primates,  
437 especially the morphologically cryptic mouse lemurs, may be more important for driving and  
438 maintaining species boundaries than previously appreciated. Syntenic analyses with improved  
439 genomic resources revealed strikingly similar genetic architecture between the expanded VIR  
440 repertoires of mouse and mouse lemur, and that some VIR subfamilies have been maintained in  
441 VIR “hotspots” across ~184 million years of mammalian evolution (dos Reis Mario et al. 2012).  
442 Characterizing additional features of VIR hotspots across species will be important for future  
443 studies translating experimental genetic studies in mice to primates such as mouse lemur.

444

## 445 **Materials and Methods**

446

### 447 **Sampling and DNA extraction**

448 To improve the resolution of the VIR repertoire expansion in lemurs, we sequenced the  
449 genomes of *Microcebus griseorufus*, *M. mittermeieri*, *M. ravelobensis*, *M. tavaratra*, and *Mizra*  
450 *zaza*. Tissue biopsies were taken from wild individuals in Madagascar from 1997-2015 and from  
451 captive individuals at the Duke Lemur Center (Supplemental Table S13). To investigate within  
452 species variation in VIR repertoires, we also resequenced eight individuals from the Duke  
453 Lemur Center *Microcebus murinus* colony. Blood and tissue samples were collected in 2016 in  
454 accordance with IACUC guidelines. For the novel strepsirrhine genomes, DNA was extracted  
455 following manufacturer instructions using the Qiagen DNeasy Blood and Tissue kit, while DNA  
456 from the *Microcebus murinus* resequenced individuals was extracted using the Qiagen  
457 MagAttract Kit (Qiagen, Germantown, MD, USA).

### 458 **Genome Sequencing and Assembly**

459

460           The genomes of *Microcebus griseorufus*, *M. mittermeieri*, *M. tavaratra*, and *Mizra*  
461 *zaza* were sequenced at the Baylor College of Medicine as approximately 400bp insert libraries  
462 on a single lane of an Illumina HiSeq 3000 with paired-end 150bp reads. We sequenced  
463 the *Microcebus ravelobensis* genome from two libraries, one with an average insert size of  
464 570bp on an Illumina HiSeq 2000 at Florida State University and the other with a 500bp insert  
465 library on 5.5% of both lanes of an Illumina NovaSeq at the Duke University GCB Sequencing  
466 Core. We also generated two additional cheirogaleid assemblies for *Cheirogaleus sibreei* and *C.*  
467 *medius* (Williams et al. 2019). *Cheirogaleus sibreei* was sequenced from a 300bp insert library  
468 on the Illumina HiSeq 4000 at the Duke University GCB Sequencing Core with paired-end  
469 150bp reads. A reference genome was generated and assembled for *Cheirogaleus medius* using  
470 Dovetail Genomics. All other genomes were assembled using MaSuRCA v3.2.2 (Zimin et al.  
471 2013). We assumed an insert size standard deviation of 15% and used automatic kmer selection.  
472 However, we did not use MaSuRCA's scaffolds for annotation and downstream analyses.  
473 Scaffolds were obtained from SSPACE (Boetzer et al. 2010), which also attempted to correct  
474 assembly errors and extend contigs from MaSuRCA. *De novo* assembly statistics are available in  
475 the supplementary material (Supplementary Table S1) as well as annotation details  
476 (Supplementary Table S14) and SRA identifiers (Supplementary Table S15).

477           The eight *Microcebus murinus* individuals were resequenced from high molecular weight  
478 DNA prepared using the 10X Genomics Chromium platform. Briefly, high-molecular weight  
479 molecules of DNA are partitioned into gel beads with unique barcodes then prepared for Illumina  
480 sequencing (Weisenfeld et al. 2017). The resulting short-read libraries are barcoded such that  
481 individual "linked reads" can be traced back to their molecule of origin assisting the genomic

482 scaffolding process. The libraries were size selected to approximately 550bp and sequenced on  
483 the Illumina HiSeq 4000 system at the Duke University GCB Sequencing Core. We then used  
484 the 10X Genomics Supernova assembly software to *de novo* assemble the resequenced genomes  
485 (version 2.0.1, 10x Genomics, San Francisco, CA, USA). One replicate individual was  
486 sequenced twice, and genomes were assembled *de novo* from each individual library.

487 BUSCO version 3.0.2 and Assemblathon2 scripts were used to assess genome quality  
488 statistics (Supplementary Figure S1; Supplementary Table S16; Simão et al. 2015). Additional  
489 genomes analyzed in this study were downloaded from the NCBI genome database and include  
490 all available Strepsirrhine genomes and additional high-quality primate and mammalian genomes  
491 for phylogenetic coverage (Supplementary Table S16).

492

### 493 **V1R repertoire estimation and ancestral count reconstruction**

494 To assess total V1R repertoires in each species, tblastn searches (e-value cut-off = 0.001)  
495 were conducted with the blast+ software suite (version ncbi-blast-2.6.0+; Altschul et al. 1990)  
496 using available mouse and mouse lemur V1R query protein sequences downloaded from NCBI  
497 GenBank against the genomes analyzed in this study (Camacho et al. 2009). Duplicate protein  
498 sequences were removed from the query database using CD-HIT version 4.6 (Li and Godzik  
499 2006). Bedtools merge (version 2.27.1) was used to merge overlapping hits within a genome, and  
500 bedtools slop and getFasta were used to extract receptor candidate regions longer than 600bp  
501 with 50 bp of upstream and downstream surrounding sequence (Quinlan and Hall 2010). For a  
502 full list of V1R containing regions analyzed see Supplementary File X).

503 To remove potential pseudogenes from further analyses, we used Geneious version 9.0.5  
504 to predict open reading frames (ORFs) and considered sequences intact if they contained an ORF



505 longer than 801bp. We then used MAFFT version 7.187 with the E-INS-i algorithm to align  
506 intact sequences from all species using the iterative approach described in Yoder 2014 (Katoh  
507 and Standley 2013; Yoder et al. 2014). The MAFFT algorithm is recommended for approaches  
508 analyzing ancestral sequence reconstruction (Vialle et al. 2018). A gene phylogeny was  
509 constructed using RAxML version 7.2.8 using the GTRGAMMAI nucleotide model with the  
510 rapid bootstrapping and search for best ML scoring tree algorithm with 500 bootstraps  
511 (Stamatakis 2014). We then assigned primate sequences to the subfamilies *Strep/I-IX* designated  
512 in Hohenbrink 2012 (Hohenbrink et al. 2012). The number of intact V1Rs, percentage of intact  
513 V1Rs, and the total V1R count were calculated for each species as well as subfamily  
514 membership. We then used Count version 10.04 with the Wagner parsimony algorithm and a  
515 gain penalty of 2 to infer total ancestral vomeronasal repertoire size and ancestral subfamily  
516 membership (Csűrös and Miklos 2009; Csűrös 2010).

517

### 518 **Establishing synteny of V1Rs across mammalian species**

519 Genomes with chromosome level scaffolding information (*Mus musculus*, *Microcebus*  
520 *murinus*, *Homo sapiens*, *Equus caballus*, *Bos taurus*, and *Canis familiaris*) were used to assess  
521 chromosomal synteny of vomeronasal subfamilies among mammalian species. SynChro (Drillon  
522 et al. 2014) version SynChro\_osx (January 2015) was used to reconstruct synteny blocks  
523 between each genome with *Mus musculus* as reference with a delta parameter of 2 using  
524 GenBank annotation files from Ensembl release 93 (Figure 6; Supplemental Figures S8-S11;  
525 Drillon et al. 2014). Orthologous block information was compared with vomeronasal receptor  
526 location for each species (Figure 7A and B).

527

## 528 **Detecting evidence of positive selection**

529 Evidence for positive selection in V1R repertoires was evaluated with PAML 4.8e (Yang  
530 2007). We used two different tests to detect both individual sites under pervasive positive  
531 selection throughout the tree (sites models) and individual branches that show an episodic burst  
532 of positive selection (branch-site models). For sites models, we applied two tests to each of the  
533 nine subfamily trees and alignments: 1) Comparison of the null hypothesis that all sites are a  
534 mixture of purifying and neutral rates of molecular evolution (M1a) and the alternative that  
535 allows for a third class of sites under positive selection (M2a; Zhang et al. 2005). 2) A null  
536 hypothesis that allows for a mixture of ten discretized beta-distributed site classes (M7), while  
537 the alternative hypothesis allows an extra component under positive selection (M8; Yang et al.  
538 2000). Each of the recognized lemur subfamilies were analyzed separately. The ggtree R  
539 package (Yu et al. 2017) was used to extract subtrees for each subfamily and alignments were  
540 parsed with Perl scripts. Because signatures of positive selection may be time-dependent  
541 (Peterson and Masel 2009; Pegueroles et al. 2013), we explored variation in sites under positive  
542 selection using six different taxonomic filters: 1) *Microcebus*, 2) Cheirogaleidae, 3)  
543 Lemuriformes, 4) Strepsirrhini, 5) Primates, and 6) Euarchontoglires. For each site test, we  
544 assumed the LRT was  $\sim \chi^2_1$  and individual sites were detected using the Bayes empirical Bayes  
545 procedure where the posterior probability of selection for each site was determined using the  
546 MLE  $dN/dS$  for the positive selection rate class (Yang et al. 2005). Individual sites were  
547 considered to have sufficient evidence for positive selection if the posterior probability was  
548 greater than 0.95. Enrichment of sites under selection in transmembrane domains used simple  
549 chi-square tests and Fisher exact tests in R (R Core Team 2018) for individual transmembrane  
550 and loop domains. Transmembrane domains were predicted using *M. murinus* sequences from

551 subfamilies *Strep*/I through IX with TMHMM (Krogh et al. 2001) through the TMHMM server  
552 (<http://www.cbs.dtu.dk/services/TMHMM/>; last accessed 29 January 2019). Since V1R genes  
553 are expected to have seven transmembrane domains (Dulac and Axel 1995), only predicted  
554 structures with seven transmembrane domains were used to determine transmembrane domain  
555 boundaries in our alignment of the entire V1R repertoire. Predictions that had fewer or more than  
556 seven transmembrane domains are assumed to be due to inaccuracies of TMHMM (Melén et al.  
557 2003) and not real domain losses or gains.

558         Of important note, the entire V1R repertoire was prohibitively large for ML optimization  
559 over the entire tree; we applied tests for selection to individual subfamilies to circumvent this  
560 limitation. This strategy also provided a way to evaluate contributions of alignment and  
561 topological errors to evidence of positive selection. First, we evaluated if the ML topology  
562 estimated from the entire repertoire was a plausible hypothesis using AU tests (Shimodaira  
563 2004). First, we estimated the ML topology and branch lengths for each subfamily using the  
564 parsed alignments (i.e. the data was not re-aligned) using the same RAxML model and search  
565 strategy as the first analysis. We then re-aligned translated amino acid data with MAFFT and  
566 estimated phylogeny once more. Site log-likelihoods were then optimized for the three  
567 topologies with RAxML and AU p-values computed with CONSEL using the default multiscale  
568 bootstrapping strategy (Shimodaira and Hasegawa 2001). Bootstrap trees were also collected for  
569 the re-aligned data, but bipartitions were drawn onto the topologies parsed from the entire V1R  
570 repertoire tree. The ratio of bootstrap support values was used to identify potential topological  
571 errors; bipartitions in the original topology that are absent when the sequences for each  
572 subfamily were re-aligned. Site tests were run for both the parsed and re-aligned data to check  
573 for consistency in the inference of sites under positive selection across alignments.

574 Branch-site tests (Zhang et al. 2005) were performed for each branch for each subfamily,  
575 except subfamily III, which was still computationally limiting. Each test assumed the LRT was  
576  $\sim X^2$ , but we applied the Benjamini-Hochberg multiple testing correction (Benjamini and  
577 Hochberg 1995). With this correction, we do expect some false positives, but the family-wise  
578 error rate should be below 5% (Anisimova and Yang 2007) while not underpowering tests  
579 towards the tips of the trees (dos Reis and Yang 2011). Tests were only performed on the parsed  
580 topology without removing any species, but branches with evidence of episodic positive  
581 selection and the bootstrap ratios with re-aligned data were mapped to nodes of the subtree  
582 topologies using ggtree to help identify cases where topological errors might lead to false  
583 signatures of positive selection (Mendes and Hahn 2016). Individual sites with evidence of  
584 episodic positive selection were evaluated using the Bayes empirical Bayes procedure (Yang et  
585 al. 2005).

#### 586 **Data Access**

587 Newly sequenced genome data will be made available through NCBI upon publication.  
588 Complete record information is given in Supplementary Material (Supplementary Table S15).

589

#### 590 **Acknowledgements**

591 We thank the Malagasy authorities for permission to conduct this research and Duke Lemur  
592 Center staff, especially Erin Ehmke, Bobby Schopler, and Cathy Williams, for providing the  
593 *Microcebus murinus* and *Mirza zaza* tissue samples. We are grateful to our colleagues at Baylor  
594 College of Medicine, Jeff Rogers and Kim Worley, for many insightful discussions of mouse  
595 lemur genomics. Phillip Brand and Jeff Thorne provided critical review of the manuscript  
596 leading to its significant improvement. We thank Simon Gregory's lab for preparing the 10x

597 Genomics libraries. We are grateful for the support of Duke Research Computing and the Duke  
598 Data Commons (NIH 1S10OD018164-01) and appreciate the donation of free sequencing for  
599 *Microcebus ravelobensis* provided by the Duke GCB Sequencing Core. ADY gratefully  
600 acknowledges support from the John Simon Guggenheim Foundation and the Alexander von  
601 Humboldt Foundation during the writing phase of this project. The study was funded by a  
602 National Science Foundation Grant DEB-1354610 to ADY and DWW and Duke University  
603 startup funds to ADY. This is Duke Lemur Center publication no. XXX.

604

605

606

607

608

609

## 610 **References**

- 611 Adipietro KA, Matsunami H, Zhuang H. 2012. Functional Evolution of Primate Odorant  
612 Receptors. In: Hirai H, Imai H, Go Y, editors. *Post-Genome Biology of Primates*. Tokyo:  
613 Springer Tokyo. p. 63–78. Available from:  
614 [http://www.springerlink.com/index/10.1007/978-4-431-54011-3\\_5](http://www.springerlink.com/index/10.1007/978-4-431-54011-3_5)
- 615 Altschul SF, Gish W, Miller W, Myers EW, Lipman DJ. 1990. Basic local alignment search tool.  
616 *Journal of Molecular Biology* 215:403–410.
- 617 Anisimova M, Yang Z. 2007. Multiple Hypothesis Testing to Detect Lineages under Positive  
618 Selection that Affects Only a Few Sites. *Molecular Biology and Evolution* 24:1219–  
619 1228.
- 620 Bear DM, Lassance J-M, Hoekstra HE, Datta SR. 2016. The Evolving Neural and Genetic  
621 Architecture of Vertebrate Olfaction. *Current Biology* 26:R1039–R1049.
- 622 Benjamini Y, Hochberg Y. 1995. Controlling the False Discovery Rate: A Practical and  
623 Powerful Approach to Multiple Testing. *Journal of the Royal Statistical Society: Series B*  
624 (Methodological) 57:289–300.
- 625 Boetzer M, Henkel CV, Jansen HJ, Butler D, Pirovano W. 2010. Scaffolding pre-assembled  
626 contigs using SSPACE. *Bioinformatics* 27:578–579.
- 627 Boillat M, Challet L, Rossier D, Kan C, Carleton A, Rodriguez I. 2015. The Vomeronasal  
628 System Mediates Sick Conspecific Avoidance. *Current Biology* 25:251–255.
- 629 Borges R, Johnson WE, O’Brien SJ, Gomes C, Heesy CP, Antunes A. 2018. Adaptive genomic  
630 evolution of opsins reveals that early mammals flourished in nocturnal environments.  
631 *BMC Genomics* [Internet] 19. Available from:  
632 <https://bmcbgenomics.biomedcentral.com/articles/10.1186/s12864-017-4417-8>
- 633 Boschhat C, Pelofi C, Randin O, Roppolo D, Luscher C, Broillet M-C, Rodriguez I. 2002.  
634 Pheromone detection mediated by a V1r vomeronasal receptor. *Nat Neurosci* 5:1261–  
635 1262.
- 636 Boughman JW. 2002. How sensory drive can promote speciation. *Trends in Ecology &*  
637 *Evolution* 17:571–577.
- 638 Brand P, Hinojosa-Díaz IA, Ayala R, Daigle M, Yurrita Obiols CL, Eltz T, Ramírez SR. 2019.  
639 An olfactory receptor gene underlies reproductive isolation in perfume-collecting orchid  
640 bees. *bioRxiv*:537423.
- 641 Brand P, Ramirez SR. 2017. The Evolutionary Dynamics of the Odorant Receptor Gene Family  
642 in Corbiculate Bees. *Genome Biology and Evolution* 9: 2023-2036.
- 643 Camacho C, Coulouris G, Avagyan V, Ma N, Papadopoulos J, Bealer K, Madden TL. 2009.  
644 BLAST+: architecture and applications. *BMC Bioinformatics* 10:421.

- 645 Chen F-C, Chen C-J, Chuang T-J, Li W-H. 2010. Gene Family Size Conservation Is a Good  
646 Indicator of Evolutionary Rates. *Molecular Biology and Evolution* 27:1750–1758.
- 647 Chung AG, Belone PM, Bímová BV, Karn RC, Laukaitis CM. 2017. Studies of an *Androgen-*  
648 *Binding Protein* Knockout Corroborate a Role for Salivary ABP in Mouse  
649 Communication. *Genetics* 205:1517–1527.
- 650 Csűrös M. 2010. Count: evolutionary analysis of phylogenetic profiles with parsimony and  
651 likelihood. *Bioinformatics* 26:1910–1912.
- 652 Csűrös M, Miklos I. 2009. Streamlining and Large Ancestral Genomes in Archaea Inferred with  
653 a Phylogenetic Birth-and-Death Model. *Molecular Biology and Evolution* 26:2087–2095.
- 654 Dai Z, Xiong Y, Dai X. 2014. Neighboring Genes Show Interchromosomal Colocalization after  
655 Their Separation. *Mol Biol Evol* 31:1166–1172.
- 656 Del Punta K, Leinders-Zufall T, Rodriguez I, Jukam D, Wysocki CJ, Ogawa S, Zufall F,  
657 Mombaerts P. 2002. Deficient pheromone responses in mice lacking a cluster of  
658 vomeronasal receptor genes. *Nature* 419:70–74.
- 659 Des Marais DL, Rausher MD. 2008. Escape from adaptive conflict after duplication in an  
660 anthocyanin pathway gene. *Nature* 454:762–765.
- 661 Dinka H, Le MT. 2017. Analysis of Pig Vomeronasal Receptor Type 1 (V1R) Promoter Region  
662 Reveals a Common Promoter Motif but Poor CpG Islands. *Animal Biotechnology*:1–8.
- 663 Dopman EB, Robbins PS, Seaman A. 2010. COMPONENTS OF REPRODUCTIVE  
664 ISOLATION BETWEEN NORTH AMERICAN PHEROMONE STRAINS OF THE  
665 EUROPEAN CORN BORER. *Evolution* 64:881–902.
- 666 dos Reis Mario, Inoue Jun, Hasegawa Masami, Asher Robert J., Donoghue Philip C. J., Yang  
667 Ziheng. 2012. Phylogenomic datasets provide both precision and accuracy in estimating  
668 the timescale of placental mammal phylogeny. *Proceedings of the Royal Society B:*  
669 *Biological Sciences* 279:3491–3500.
- 670 Drea CM. 2015. D'scent of man: A comparative survey of primate chemosignaling in relation to  
671 sex. *Hormones and Behavior* 68:117–133.
- 672 Drillon G, Carbone A, Fischer G. 2014. SynChro: A Fast and Easy Tool to Reconstruct and  
673 Visualize Synteny Blocks along Eukaryotic Chromosomes. Fairhead C, editor. *PLoS ONE*  
674 9:e92621.
- 675 Dulac C, Axel R. 1995. A novel family of genes encoding putative pheromone receptors in  
676 mammals. *Cell* 83:195–206.
- 677 Fu X, Yan Y, Xu PS, Geerlof-Vidavsky I, Chong W, Gross ML, Holy TE. 2015. A Molecular  
678 Code for Identity in the Vomeronasal System. *Cell* 163:313–323.

- 679 Guschanski K, Warnefors M, Kaessmann H. 2017. The evolution of duplicate gene expression in  
680 mammalian organs. *Genome Research* [Internet]. Available from:  
681 <http://genome.cshlp.org/content/early/2017/08/04/gr.215566.116.abstract>
- 682 Haga-Yamanaka S, Ma L, He J, Qiu Q, Lavis LD, Looger LL, Yu CR. 2014. Integrated action of  
683 pheromone signals in promoting courtship behavior in male mice. *Elife* 3:e03025.
- 684 Hawkins MTR, Culligan RR, Frasier CL, Dikow RB, Hagensohn R, Lei R, Louis EE. 2018.  
685 Genome sequence and population declines in the critically endangered greater bamboo  
686 lemur (*Prolemur simus*) and implications for conservation. *BMC Genomics* [Internet] 19.  
687 Available from: [https://bmcgenomics.biomedcentral.com/articles/10.1186/s12864-018-](https://bmcgenomics.biomedcentral.com/articles/10.1186/s12864-018-4841-4)  
688 [4841-4](https://bmcgenomics.biomedcentral.com/articles/10.1186/s12864-018-4841-4)
- 689 Hohenbrink P, Dempewolf S, Zimmermann E, Mundy NI, Radespiel U. 2014. Functional  
690 promiscuity in a mammalian chemosensory system: extensive expression of vomeronasal  
691 receptors in the main olfactory epithelium of mouse lemurs. *Frontiers in Neuroanatomy*  
692 [Internet] 8. Available from:  
693 <http://journal.frontiersin.org/article/10.3389/fnana.2014.00102/abstract>
- 694 Hohenbrink P, Radespiel U, Mundy NI. 2012. Pervasive and Ongoing Positive Selection in the  
695 Vomeronasal-1 Receptor (V1R) Repertoire of Mouse Lemurs. *Molecular Biology and*  
696 *Evolution* 29:3807–3816.
- 697 Hotaling S, Foley ME, Lawrence NM, Bocanegra J, Blanco MB, Rasoloarison R, Kappeler PM,  
698 Barrett MA, Yoder AD, Weisrock DW. 2016. Species discovery and validation in a  
699 cryptic radiation of endangered primates: coalescent-based species delimitation in  
700 Madagascar’s mouse lemurs. *Molecular Ecology* 25:2029–2045.
- 701 Hughes GM, Boston ESM, Finarelli JA, Murphy WJ, Higgins DG, Teeling EC. 2018. The Birth  
702 and Death of Olfactory Receptor Gene Families in Mammalian Niche Adaptation. Satta  
703 Y, editor. *Molecular Biology and Evolution* 35:1390–1406.
- 704 Hurst JL, Beynon RJ, Armstrong SD, Davidson AJ, Roberts SA, Gómez-Baena G, Smadja CM,  
705 Ganem G. 2017. Molecular heterogeneity in major urinary proteins of *Mus musculus*  
706 subspecies: potential candidates involved in speciation. *Scientific Reports* [Internet] 7.  
707 Available from: <http://www.nature.com/articles/srep44992>
- 708 Isogai Y, Si S, Pont-Lezica L, Tan T, Kapoor V, Murthy VN, Dulac C. 2011. Molecular  
709 organization of vomeronasal chemoreception. *Nature* 478:241–245.
- 710 Kambere MB, Lane RP. 2007. Co-regulation of a large and rapidly evolving repertoire of  
711 odorant receptor genes. *BMC Neuroscience* 8:S2.
- 712 Kambere MB, Lane RP. 2009. Exceptional LINE Density at V1R Loci: The Lyon Repeat  
713 Hypothesis Revisited on Autosomes. *Journal of Molecular Evolution* 68:145–159.



- 714 Karn RC, Young JM, Laukaitis CM. 2010. A Candidate Subspecies Discrimination System  
715 Involving a Vomeronasal Receptor Gene with Different Alleles Fixed in *M. m.*  
716 *domesticus* and *M. m. musculus*. PLoS ONE 5:e12638.
- 717 Katoh K, Standley DM. 2013. MAFFT Multiple Sequence Alignment Software Version 7:  
718 Improvements in Performance and Usability. Mol Biol Evol 30:772–780.
- 719 Keller TE, Yi SV. 2014. DNA methylation and evolution of duplicate genes. Proc Natl Acad Sci  
720 USA 111:5932.
- 721 Kobilka BK, Kobilka TS, Daniel K, Regan JW, Caron MG, Lefkowitz RJ. 1988. Chimeric alpha  
722 2-,beta 2-adrenergic receptors: delineation of domains involved in effector coupling and  
723 ligand binding specificity. Science 240:1310–1316.
- 724 Krogh A, Larsson B, von Heijne G, Sonnhammer ELL. 2001. Predicting transmembrane protein  
725 topology with a hidden markov model: application to complete genomes 11 Edited by F.  
726 Cohen. Journal of Molecular Biology 305:567–580.
- 727 Kurzweil VC, Getman M, Comparative Sequencing Program N, Green ED, Lane RP. 2009.  
728 Dynamic evolution of V1R putative pheromone receptors between *Mus musculus* and  
729 *Mus spretus*. BMC Genomics 10:74.
- 730 Lane RP, Cutforth T, Axel R, Hood L, Trask BJ. 2002. Sequence analysis of mouse vomeronasal  
731 receptor gene clusters reveals common promoter motifs and a history of recent  
732 expansion. Proceedings of the National Academy of Sciences 99:291–296.
- 733 Larsen PA, Harris RA, Liu Y, Murali SC, Campbell CR, Brown AD, Sullivan BA, Shelton J,  
734 Brown SJ, Raveendran M, et al. 2017. Hybrid de novo genome assembly and centromere  
735 characterization of the gray mouse lemur (*Microcebus murinus*). BMC Biology [Internet]  
736 15. Available from: [https://bmcbiol.biomedcentral.com/articles/10.1186/s12915-017-](https://bmcbiol.biomedcentral.com/articles/10.1186/s12915-017-0439-6)  
737 0439-6
- 738 Larsen PA, Heilman AM, Yoder AD. 2014. The utility of PacBio circular consensus sequencing  
739 for characterizing complex gene families in non-model organisms. BMC Genomics  
740 15:720.
- 741 Lei R, Frasier CL, McLain AT, Taylor JM, Bailey CA, Engberg SE, Ginter AL,  
742 Randriamampionona R, Groves CP, Mittermeier RA, et al. 2014. Revision of  
743 Madagascar's Dwarf Lemurs (*Cheirogaleidae: Cheirogaleus*): Designation of Species,  
744 Candidate Species Status and Geographic Boundaries Based on Molecular and  
745 Morphological Data. Primate Conservation 28:9–35.
- 746 Leinders-Zufall T, Lane AP, Puche AC, Ma W, Novotny MV, Shipley MT, Zufall F. 2000.  
747 Ultrasensitive pheromone detection by mammalian vomeronasal neurons. Nature  
748 405:792–796.
- 749 Li W, Godzik A. 2006. Cd-hit: a fast program for clustering and comparing large sets of protein  
750 or nucleotide sequences. Bioinformatics 22:1658–1659.

- 751 Loire E, Tusso S, Caminade P, Severac D, Boursot P, Ganem G, Smadja CM. 2017. Do changes  
752 in gene expression contribute to sexual isolation and reinforcement in the house mouse?  
753 *Molecular Ecology* 26:5189–5202.
- 754 Luo M, Fee MS, Katz LC. 2003. Encoding Pheromonal Signals in the Accessory Olfactory Bulb  
755 of Behaving Mice. *Science* 299:1196–1201.
- 756 Lynch M, Conery JS. 2000. The Evolutionary Fate and Consequences of Duplicate Genes.  
757 *Science* 290:1151–1155.
- 758 Makova KD, Li W-H. 2003. Divergence in the Spatial Pattern of Gene Expression Between  
759 Human Duplicate Genes. *Genome Res.* 13:1638–1645.
- 760 Melén K, Krogh A, von Heijne G. 2003. Reliability measures for membrane protein topology  
761 prediction algorithms. *J Mol Biol.* 327:735–744.  
762
- 763 Mendelson TC. 2003. Evidence of Intermediate and Asymmetrical Behavioral Isolation Between  
764 Orangethroat and Orangebelly darters (Teleostei:Percidae). *The American Midland*  
765 *Naturalist* 150:343–348.
- 766 Mendes FK, Hahn MW. 2016. Gene Tree Discordance Causes Apparent Substitution Rate  
767 Variation. *Systematic Biology* 65:711–721.
- 768 Meyer WK, Venkat A, Kermany AR, van de Geijn B, Zhang S, Przeworski M. 2015.  
769 Evolutionary history inferred from the de novo assembly of a nonmodel organism, the  
770 blue-eyed black lemur. *Molecular Ecology* 24:4392–4405.
- 771 Michaloski JS, Galante PAF, Nagai MH, Armelin-Correa L, Chien M-S, Matsunami H, Malnic  
772 B. 2011. Common Promoter Elements in Odorant and Vomeronasal Receptor  
773 Genes. Meyerhof W, editor. *PLoS ONE* 6:e29065.
- 774 Moriya-Ito K, Hayakawa T, Suzuki H, Hagino-Yamagishi K, Nikaido M. 2018. Evolution of  
775 vomeronasal receptor 1 ( V1R ) genes in the common marmoset ( *Callithrix jacchus* ).  
776 *Gene* 642:343–353.
- 777 Nei M, Gu X, Sitnikova T. 1997. Evolution by the birth-and-death process in multigene families  
778 of the vertebrate immune system. *Proc Natl Acad Sci USA* 94:7799.
- 779 Nikaido M, Ota T, Hirata T, Suzuki H, Satta Y, Aibara M, Mzighani SI, Sturmbauer C, Hagino-  
780 Yamagishi K, Okada N. 2014. Multiple Episodic Evolution Events in V1R Receptor  
781 Genes of East-African Cichlids. *Genome Biol Evol* 6:1135–1144.
- 782 Nozawa M, Kawahara Y, Nei M. 2007. Genomic drift and copy number variation of sensory  
783 receptor genes in humans. *Proc Natl Acad Sci USA* 104:20421.
- 784 Ohara H, Nikaido M, Date-Ito A, Mogi K, Okamura H, Okada N, Takeuchi Y, Mori Y, Hagino-  
785 Yamagishi K. 2009. Conserved repertoire of orthologous vomeronasal type 1 receptor  
786 genes in ruminant species. *BMC Evolutionary Biology* 9:233.

- 787 O'Toole ÁN, Hurst LD, McLysaght A. 2018. Faster Evolving Primate Genes Are More Likely to  
788 Duplicate. *Mol Biol Evol* 35:107–118.
- 789 Palczewski K, Kumasaka T, Hori T, Behnke CA, Motoshima H, Fox BA, Trong IL, Teller DC,  
790 Okada T, Stenkamp RE, et al. 2000. Crystal Structure of Rhodopsin: A G Protein-  
791 Coupled Receptor. *Science* 289:739–745.
- 792 Papes F, Logan DW, Stowers L. 2010. The Vomeronasal Organ Mediates Interspecies Defensive  
793 Behaviors through Detection of Protein Pheromone Homologs. *Cell* 141:692–703.
- 794 Park SH, Podlaha O, Grus WE, Zhang J. 2011. The Microevolution of V1r Vomeronasal  
795 Receptor Genes in Mice. *Genome Biology and Evolution* 3:401–412.
- 796 Pegueroles C, Laurie S, Albà MM. 2013. Accelerated Evolution after Gene Duplication: A  
797 Time-Dependent Process Affecting Just One Copy. *Molecular Biology and Evolution*  
798 30:1830–1842.
- 799 Perret M. 1996. Manipulation of sex ratio at birth by urinary cues in a prosimian primate.  
800 *Behavioral Ecology and Sociobiology* 38:259–266.
- 801 Perret M, Colas S. 1997. Manipulation of sex ratio at birth and maternal investment in female  
802 mouse lemurs (*Microcebus murinus*, Primates). *Applied Animal Behaviour Science*  
803 51:275–283.
- 804 Perry GH, Reeves D, Melsted P, Ratan A, Miller W, Michelini K, Louis EE, Pritchard JK,  
805 Mason CE, Gilad Y. 2012. A Genome Sequence Resource for the Aye-Aye (*Daubentonia*  
806 *madagascariensis*), a Nocturnal Lemur from Madagascar. *Genome Biology and Evolution*  
807 4:126–135.
- 808 Peterson GI, Masel J. 2009. Quantitative Prediction of Molecular Clock and Ka/Ks at Short  
809 Timescales. *Molecular Biology and Evolution* 26:2595–2603.
- 810 Pilpel Y, Lancet D. 1999. The variable and conserved interfaces of modeled olfactory receptor  
811 proteins. *Protein Science* 8:969–977.
- 812 Quinlan AR, Hall IM. 2010. BEDTools: a flexible suite of utilities for comparing genomic  
813 features. *Bioinformatics* 26:841–842.
- 814 dos Reis M, Gunnell GF, Barba-Montoya J, Wilkins A, Yang Z, Yoder AD. 2018. Using  
815 Phylogenomic Data to Explore the Effects of Relaxed Clocks and Calibration Strategies  
816 on Divergence Time Estimation: Primates as a Test Case. Ho S, editor. *Systematic*  
817 *Biology* 67:594–615.
- 818 dos Reis M, Yang Z. 2011. Approximate Likelihood Calculation on a Phylogeny for Bayesian  
819 Estimation of Divergence Times. *Molecular Biology and Evolution* 28:2161–2172.

- 820 Schmitz J, Noll A, Raabe CA, Churakov G, Voss R, Kiefmann M, Rozhdestvensky T, Brosius J,  
821 Baertsch R, Clawson H, et al. 2016. Genome sequence of the basal haplorrhine primate  
822 *Tarsius syrichta* reveals unusual insertions. *Nature Communications* 7:12997.
- 823 Servedio MR, Boughman JW. 2017. The Role of Sexual Selection in Local Adaptation and  
824 Speciation. *Annual Review of Ecology, Evolution, and Systematics* 48:85–109.
- 825 Servedio MR, Noor MAF. 2003. The Role of Reinforcement in Speciation: Theory and Data.  
826 *Annu. Rev. Ecol. Evol. Syst.* 34:339–364.
- 827 Shimodaira H. 2004. Approximately unbiased tests of regions using multistep-multiscale  
828 bootstrap resampling. *The Annals of Statistics* 32:2616–2641.
- 829 Shimodaira H, Hasegawa M. 2001. CONSEL: for assessing the confidence of phylogenetic tree  
830 selection. *Bioinformatics* 17:1246–1247.
- 831 Simão FA, Waterhouse RM, Ioannidis P, Kriventseva EV, Zdobnov EM. 2015. BUSCO:  
832 assessing genome assembly and annotation completeness with single-copy orthologs.  
833 *Bioinformatics* 31:3210–3212.
- 834 Smadja CM, Loire E, Caminade P, Thoma M, Latour Y, Roux C, Thoss M, Penn DJ, Ganem G,  
835 Boursot P. 2015. Seeking signatures of reinforcement at the genetic level: a hitchhiking  
836 mapping and candidate gene approach in the house mouse. *Molecular Ecology* 24:4222–  
837 4237.
- 838 Stamatakis A. 2014. RAxML version 8: a tool for phylogenetic analysis and post-analysis of  
839 large phylogenies. *Bioinformatics* 30:1312–1313.
- 840 Sterling EJ, Richard AF. 1995. Social Organization in the Aye-Aye (*Daubentonia*  
841 *Madagascariensis*) and the Perceived Distinctiveness of Nocturnal Primates. In: Alterman  
842 L, Doyle GA, Izard MK, editors. *Creatures of the Dark: The Nocturnal Prosimians*.  
843 Boston, MA: Springer US. p. 439–451. Available from: [https://doi.org/10.1007/978-1-4757-2405-9\\_26](https://doi.org/10.1007/978-1-4757-2405-9_26)  
844
- 845 Stewart R, Lane RP. 2007. V1R promoters are well conserved and exhibit common putative  
846 regulatory motifs. *BMC Genomics* 8:253.
- 847 Sündermann D, Scheumann M, Zimmermann E. 2008. Olfactory predator recognition in  
848 predator-naïve gray mouse lemurs (*Microcebus murinus*). *Journal of Comparative*  
849 *Psychology* 122:146–155.
- 850 Tan Y, Yoder AD, Yamashita N, Li W-H. 2005. Evidence from opsin genes rejects nocturnality  
851 in ancestral primates. *Proceedings of the National Academy of Sciences* 102:14712–  
852 14716.
- 853 Vialle RA, Tamuri AU, Goldman N. 2018. Alignment Modulates Ancestral Sequence  
854 Reconstruction Accuracy. Thorne J, editor. *Molecular Biology and Evolution* 35:1783–  
855 1797.

- 856 Wang G, Shi P, Zhu Z, Zhang Y -p. 2010. More Functional V1R Genes Occur in Nest-Living  
857 and Nocturnal Terricolous Mammals. *Genome Biology and Evolution* 2:277–283.
- 858 Weisenfeld NI, Kumar V, Shah P, Church DM, Jaffe DB. 2017. Direct determination of diploid  
859 genome sequences. *Genome Res.* [Internet]. Available from:  
860 <http://genome.cshlp.org/content/early/2017/03/15/gr.214874.116>
- 861 Williams RC, Blanco MB, Poelstra JW, Hunnicutt KE, Comeault AA, Yoder AD. 2019.  
862 Conservation genomic analysis reveals ancient introgression and declining levels of  
863 genetic diversity in Madagascar's hibernating dwarf lemurs. bioRxiv doi:  
864 <https://doi.org/10.1101/620724>  
865
- 866 Xie T, Yang Q-Y, Wang X-T, McLysaght A, Zhang H-Y. 2016. Spatial Colocalization of  
867 Human Ohnolog Pairs Acts to Maintain Dosage-Balance. *Mol Biol Evol* 33:2368–2375.
- 868 Yang L, Gaut BS. 2011. Factors that Contribute to Variation in Evolutionary Rate among  
869 Arabidopsis Genes. *Mol Biol Evol* 28:2359–2369.
- 870 Yang Z. 2007. PAML 4: Phylogenetic Analysis by Maximum Likelihood. *Molecular Biology*  
871 *and Evolution* 24:1586–1591.
- 872 Yang Z, Nielsen R, Goldman N, Pedersen A-MK. 2000. Codon-Substitution Models for  
873 Heterogeneous Selection Pressure at Amino Acid Sites. *Genetics* 155:431.
- 874 Yang Z, Wong WSW, Nielsen R. 2005. Bayes Empirical Bayes Inference of Amino Acid Sites  
875 Under Positive Selection. *Molecular Biology and Evolution* 22:1107–1118.
- 876 Yang Z, Yoder AD. 2003. Comparison of Likelihood and Bayesian Methods for Estimating  
877 Divergence Times Using Multiple Gene Loci and Calibration Points, with Application to  
878 a Radiation of Cute-Looking Mouse Lemur Species. *Systematic Biology* 52:705–716.
- 879 Yoder AD, Chan LM, dos Reis M, Larsen PA, Campbell CR, Rasoloarison R, Barrett M, Roos  
880 C, Kappeler P, Bielawski J, et al. 2014. Molecular Evolutionary Characterization of a  
881 V1R Subfamily Unique to Strepsirrhine Primates. *Genome Biology and Evolution* 6:213–  
882 227.
- 883 Yoder AD, Larsen PA. 2014. The molecular evolutionary dynamics of the vomeronasal receptor  
884 (class 1) genes in primates: a gene family on the verge of a functional breakdown.  
885 *Frontiers in Neuroanatomy* [Internet] 8. Available from:  
886 <http://journal.frontiersin.org/article/10.3389/fnana.2014.00153/abstract>
- 887 Yoder AD, Weisrock DW, Rasoloarison RM, Kappeler PM. 2016. Cheirogaleid diversity and  
888 evolution: big questions about small primates. In: Lehman SM, Radespiel U,  
889 Zimmermann E, editors. *The Dwarf and Mouse Lemurs of Madagascar*. Cambridge:  
890 Cambridge University Press. p. 3–20. Available from:  
891 <https://www.cambridge.org/core/product/identifier/CBO9781139871822A010/type/book>  
892 [\\_part](#)

- 893 Yohe LR, Brand P. 2018. Evolutionary ecology of chemosensation and its role in sensory  
894 drive. Fuller R, editor. *Current Zoology* 64:525–533.
- 895 Yohe LR, Davies KT, Rossiter SJ, Davalos L. 2018. Expressed vomeronasal type-1 receptors  
896 (V1rs) in bats uncover conserved mechanisms of social chemical signaling. bioRxiv  
897 [Internet]. Available from: <http://biorxiv.org/content/early/2018/04/05/293472.abstract>
- 898 Young JM, Massa HF, Hsu L, Trask BJ. 2010. Extreme variability among mammalian V1R gene  
899 families. *Genome Research* 20:10–18.
- 900 Yu G, Smith DK, Zhu H, Guan Y, Lam TT-Y. 2017. ggtree: an r package for visualization and  
901 annotation of phylogenetic trees with their covariates and other associated data. *Methods*  
902 *in Ecology and Evolution* 8:28–36.
- 903 Zhang J, Nielsen R, Yang Z. 2005. Evaluation of an Improved Branch-Site Likelihood Method  
904 for Detecting Positive Selection at the Molecular Level. *Molecular Biology and*  
905 *Evolution* 22:2472–2479.
- 906 Zhang J, Rosenberg HF, Nei M. 1998. Positive Darwinian selection after gene duplication in  
907 primate ribonuclease genes. *Proc Natl Acad Sci USA* 95:3708.
- 908 Zimin AV, Marçais G, Puiu D, Roberts M, Salzberg SL, Yorke JA. 2013. The MaSuRCA  
909 genome assembler. *Bioinformatics* 29:2669–2677.
- 910
- 911

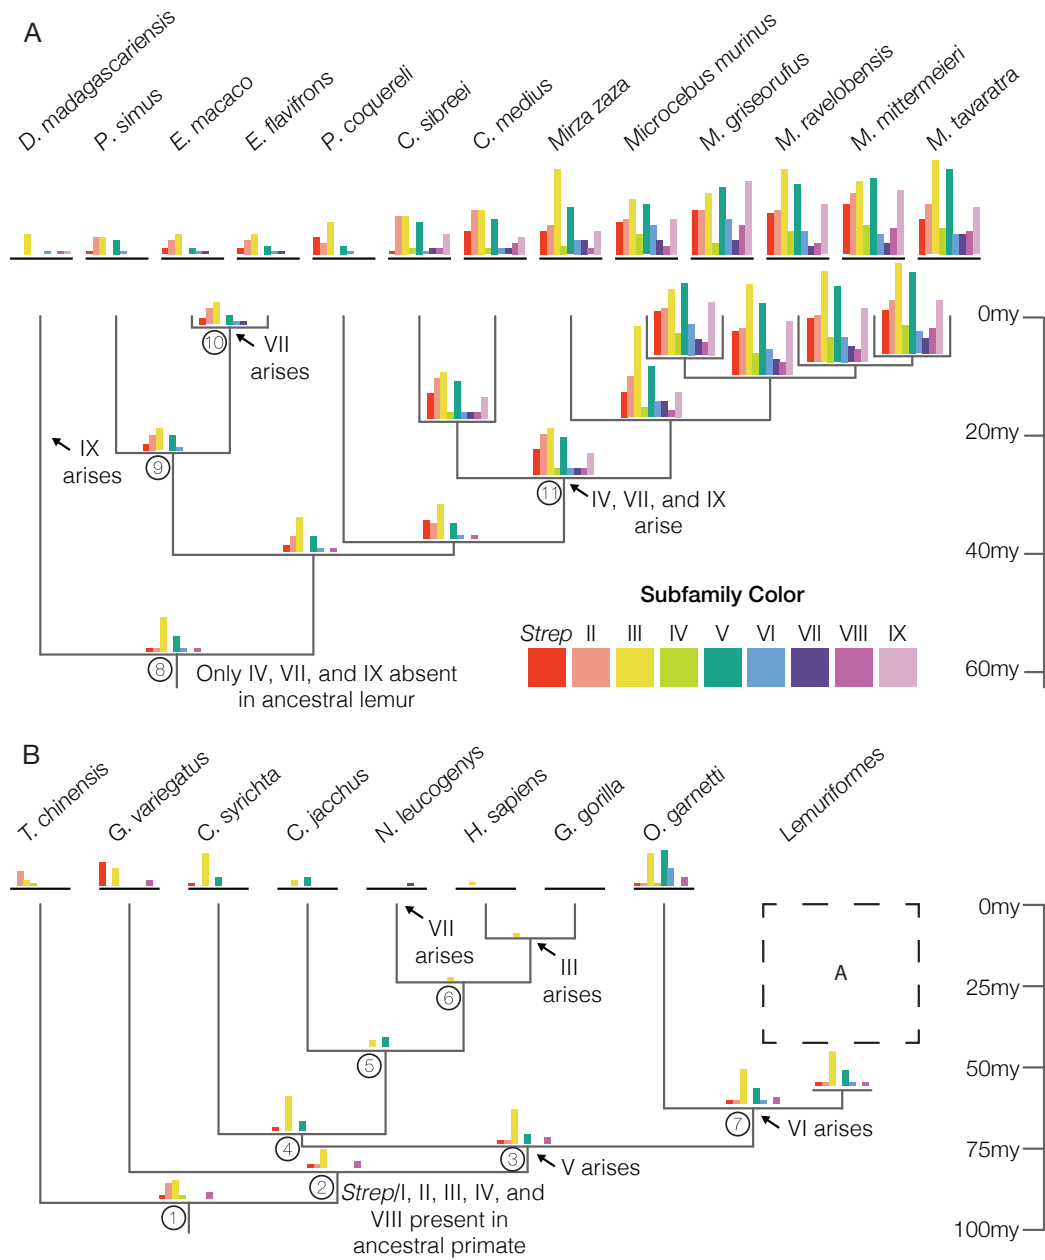

912

913

914 **Figure 1. V1R subfamily membership across the primate phylogeny.** Membership was

915 assessed for available strepsirrhine genomes (A) and for select primate outgroups (B) and

916 estimated using the Count software for ancestral lineages. Bar graphs show absolute gene count

917 for each subfamily. Predicted gene subfamily origins are annotated with arrows. Tree adapted

918 from dos Reis 2018 (dos Reis et al. 2018). Circled node numbers correspond with Table 1.

919

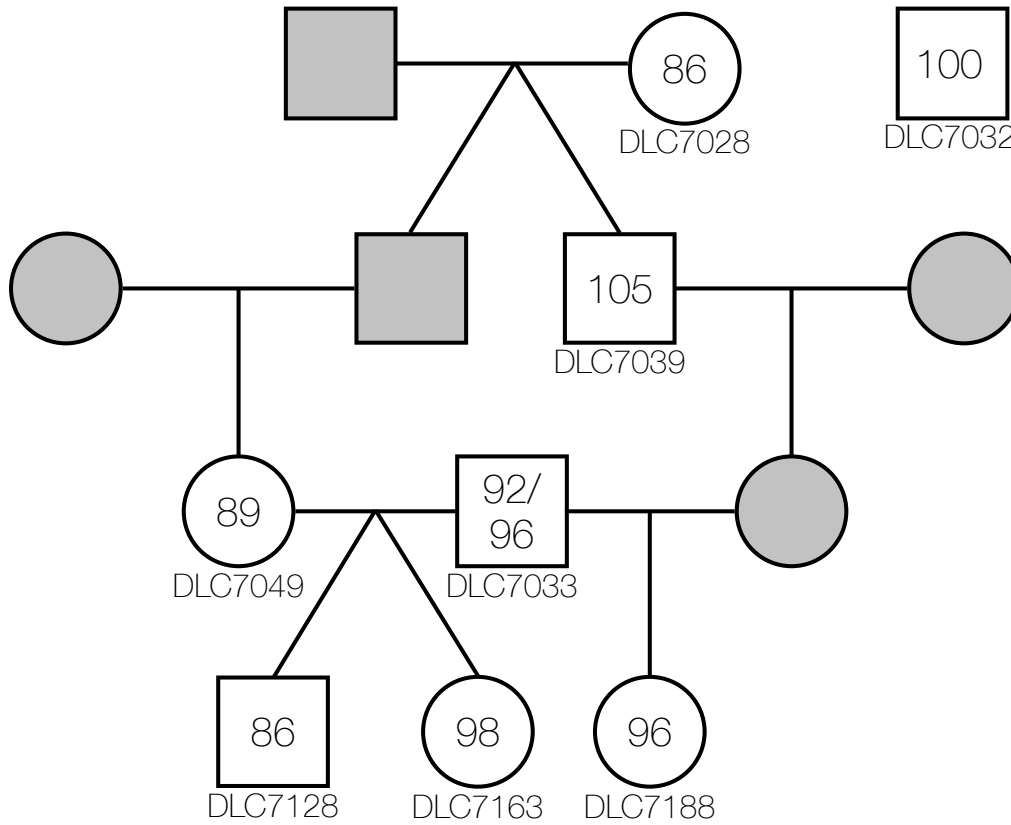

920

921

922 **Figure 2. Intraspecific variation in V1R repertoire size estimates across eight closely-**  
923 **related *Microcebus murinus* individuals.** Genomes were *de novo* assembled and mined for loci  
924 with significant V1R homology and an ORF longer than 801bp. Individual DLC7033 was  
925 sequenced twice and repertoire size estimates are reported for both assemblies. Squares  
926 represent males and circles represent females. Horizontal lines indicate mate pairs (mother and  
927 father) and vertical or slanted lines indicate parent to offspring relationship. Numbers inside  
928 the symbols represent repertoire size estimates. Individuals represented by grey symbols were  
929 not sequenced.

930

931



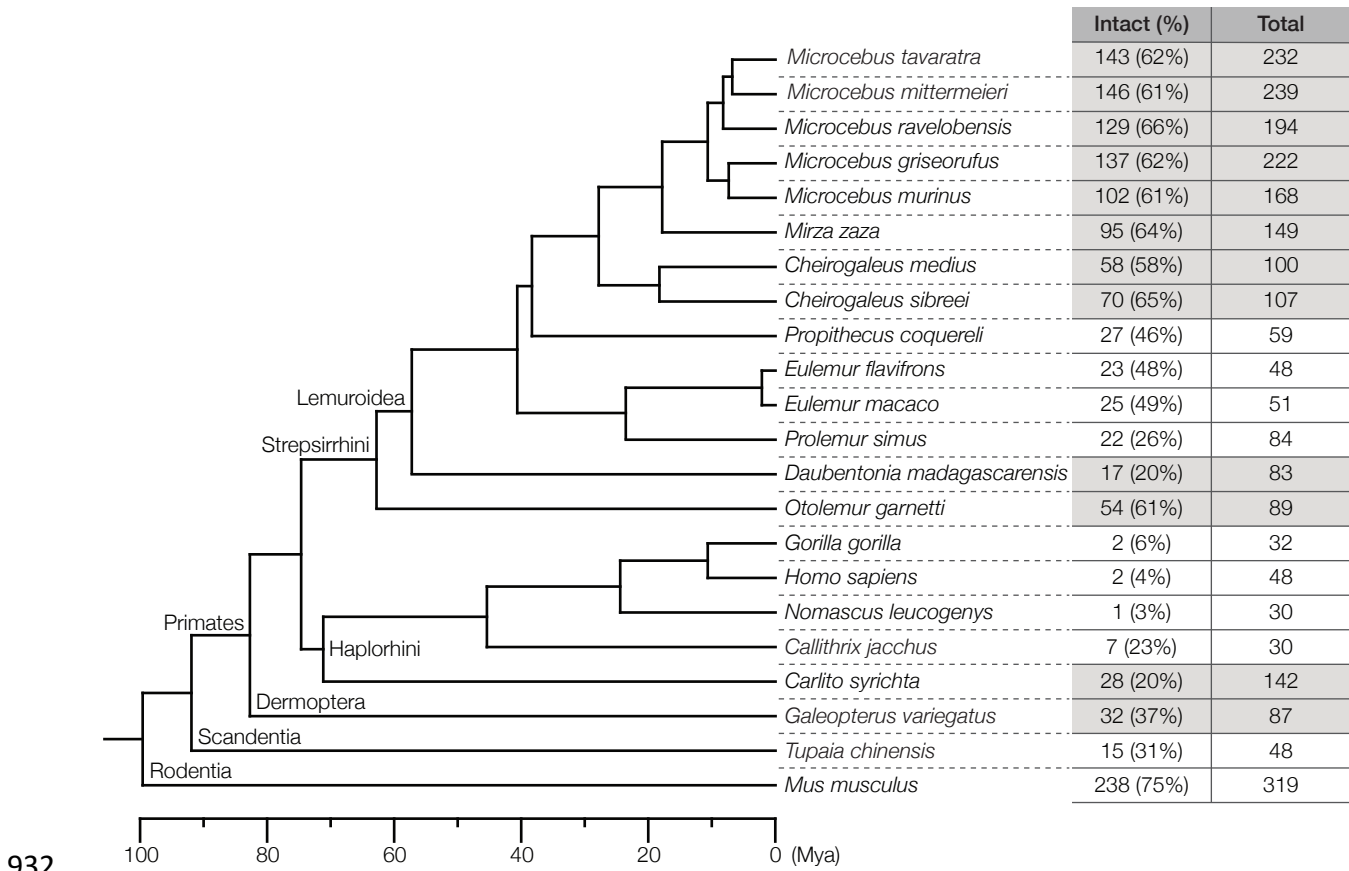

932

933

934 **Figure 3. V1R repertoire size estimates across the strepsirrhine phylogeny.** Sequences with

935 V1R homology were mined from available strepsirrhine and select outgroup genomes. Total

936 V1Rs consist of all genomic regions with V1R homology that are  $\geq 600$ bp in length. Intact genes

937 are defined by vomeronasal homology and a  $\geq 801$ bp ORF. Nocturnal species are highlighted in

938 gray. Tree adapted from dos Reis 2018 (dos Reis et al. 2018).

939

940

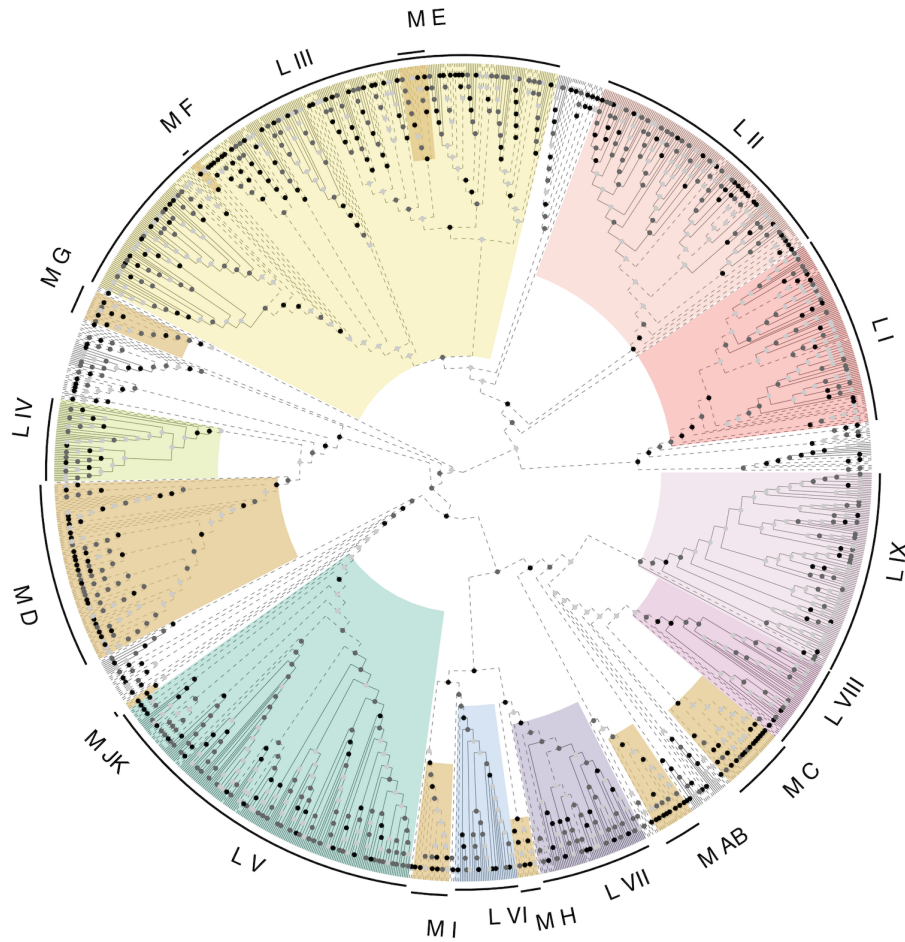

941

942 **Figure 4. ML topology of V1R repertoire.** V1R subfamilies in primates are highlighted and

943 circumscribed based on Hohenbrink et al. (2012). There are nine described subfamilies in

944 lemurs, L *Strep/I* through L IX, although not all lemur sequences fall into these subfamilies.

945 Clades of V1R subfamilies with known function in mice are shown in burnt orange (M AB

946 through M JK). Circles at nodes represent bootstrap support. Black nodes have 100% bootstrap

947 support, dark grey nodes are supported with 70% or more bipartitions from bootstrap trees, and

948 light grey nodes are weak or unsupported with less than 70% of bipartitions across bootstrap

949 replicates. The topology is arbitrarily rooted for visualization. Solid lines represent dwarf and

950 mouse lemur V1Rs (or branches subtending clades of dwarf and mouse lemur V1Rs). Dashed

951 lines represent V1R lineages that are not within Cheirogaleidae.

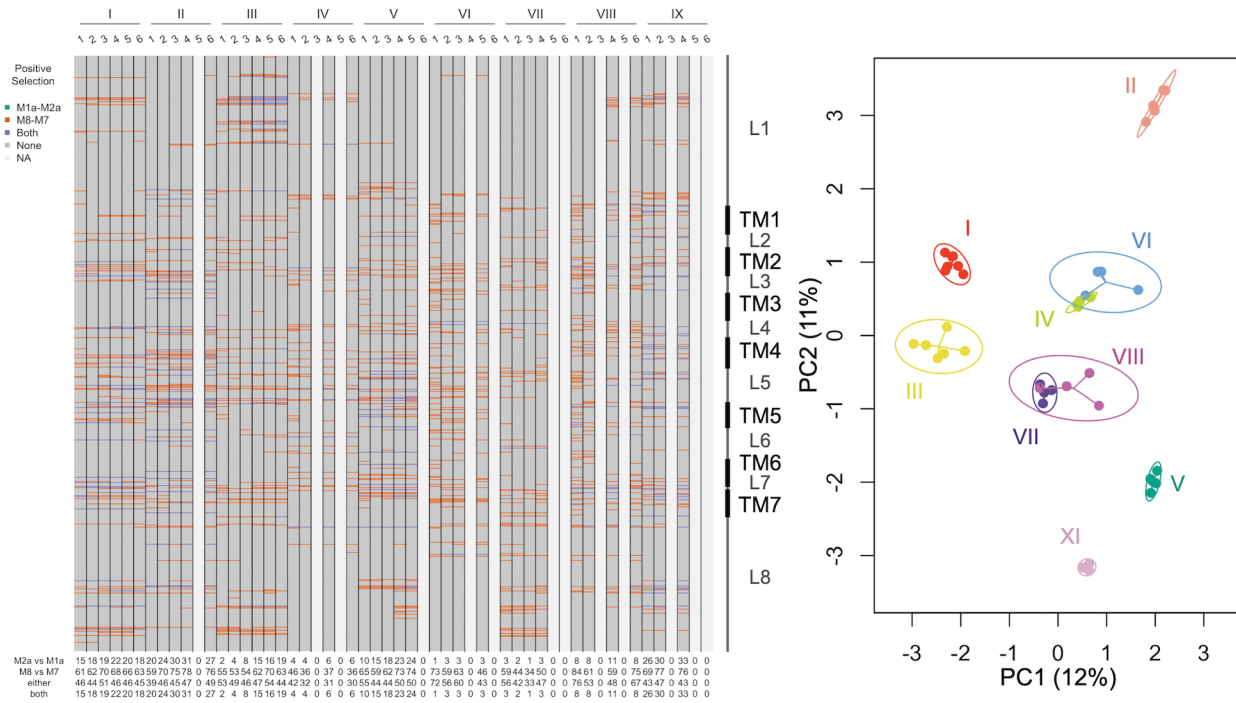

952

953

954 **Figure 5. Sites under selection across the V1R alignment.** Subfamilies are given at the top

955 along with numbers that correspond to taxonomic filters. The first aligned codon starts at the top

956 and the aligned codon position 588 at the bottom, with boundaries of transmembrane domains to

957 the right. Sites under selection are colored. Missing columns means that the filter was redundant.

958 Numbers along the bottom are counts of sites under selection detected by both model

959 comparisons and their overlap. The boundaries of loop domains (L) and transmembrane domains

960 (T) are shown along the aligned V1R repertoire. A PCA of sites under selection treated all

961 codons as a binary character, determined by whether the site was under selection or not. Circle

962 are 95% CIs for centroids of subfamily variation by taxonomic filters.

963

964

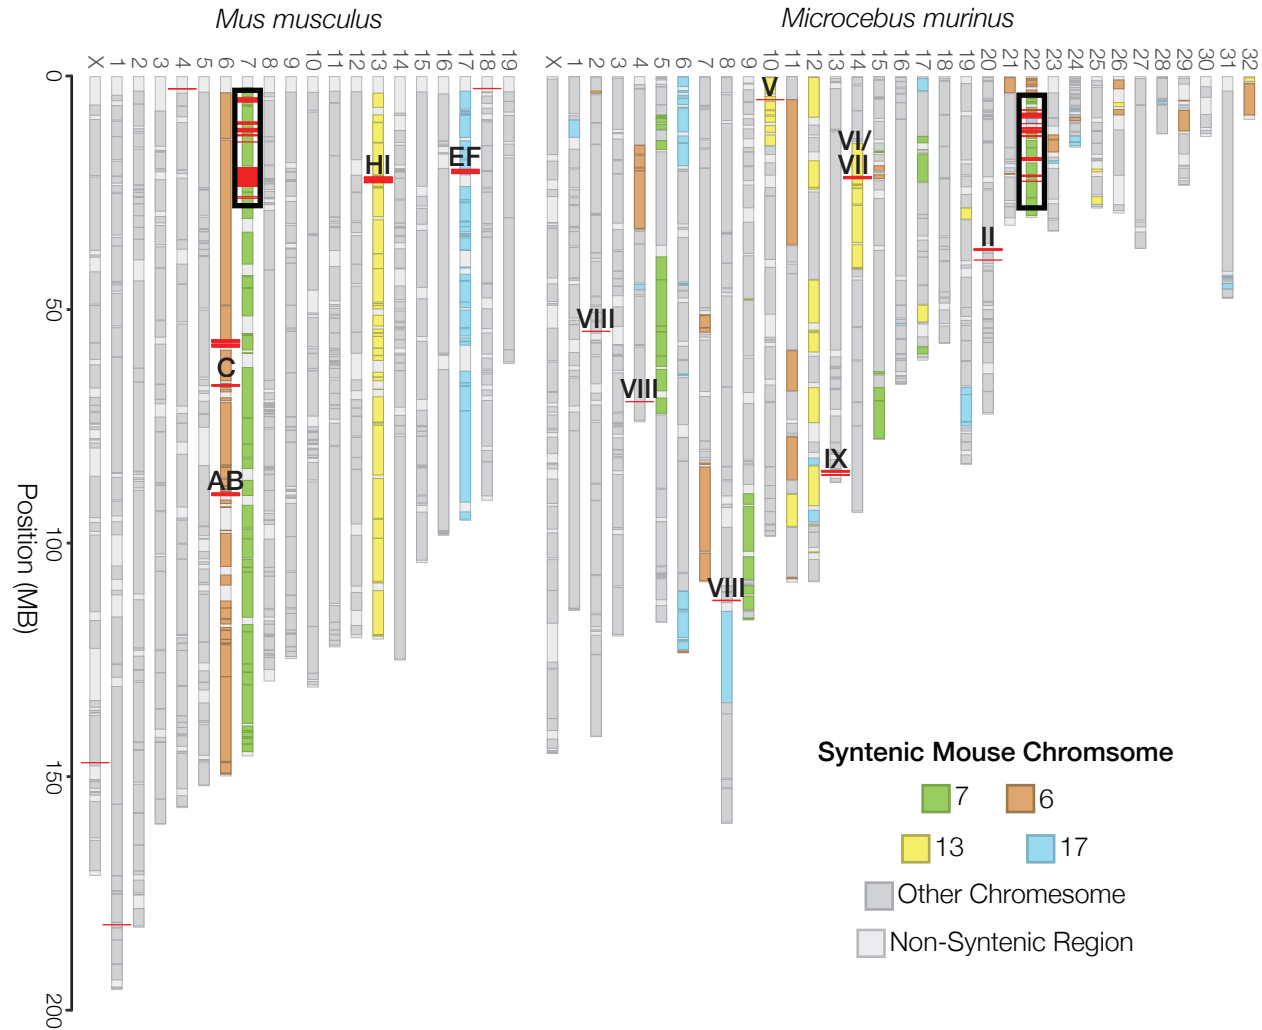

965

966

967 **Figure 6. Chromosomal synteny between mouse and mouse lemur V1R-containing regions.**

968 Synteny between *Mus musculus* and *Microcebus murinus* was estimated using the SynChro

969 software. Chromosomes are colored relative to V1R-containing mouse chromosomes. V1R loci

970 are indicated with red lines and are labelled by subfamily identity. Regions outlined in black are

971 enriched for V1R loci and are examined in further detail in Figure 7B.

972

973

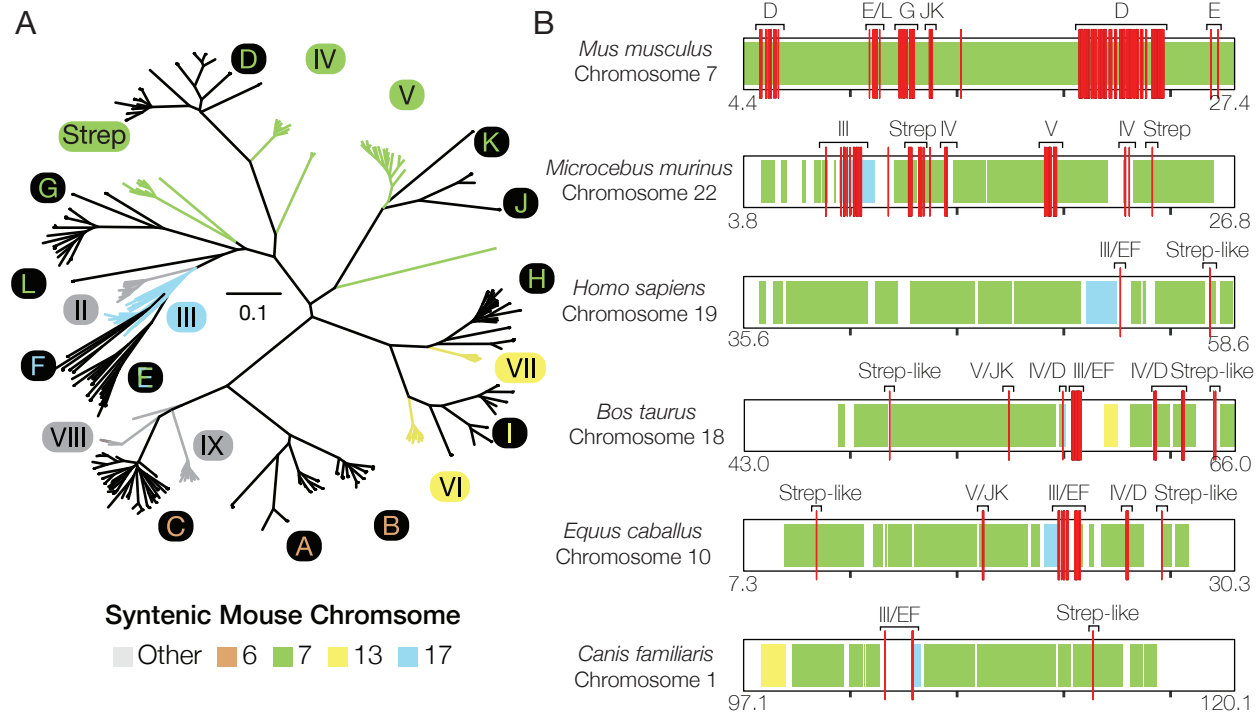

974

975

976 **Figure 7. Highly orthologous loci on “hotspot” V1R chromosome.** (A) RAxML tree of *Mus*  
 977 *musculus* V1R cDNA sequences with intact V1R sequences from the *Microcebus murinus*  
 978 genome. Mouse subfamilies are encircled in black and labelled by chromosomal location. Mouse  
 979 lemur subfamilies are labelled in black and encircled in the color corresponding to the syntenic  
 980 mouse chromosomal location. (B) Chromosomal “hotspot” regions enriched in V1R loci from  
 981 several mammalian taxa. Orthologous regions are shaded by syntenic mouse chromosome. V1Rs  
 982 loci are labelled by phylogenetic relationship to mouse/lemur subfamilies. Starting and end  
 983 genomic positions are given for each species, and all regions are 23Mb long with tick marks  
 984 representing 5 Mb intervals.

985

986 **Tables**

987 **Table 1. Inference of V1R birth-death process within primates.**

| Node/lineage               | Clade                    | Gains - Losses | Subfamilies Retained    | Subfamilies Gained | Subfamilies Lost |
|----------------------------|--------------------------|----------------|-------------------------|--------------------|------------------|
| Node 1                     | Euarchonta               | NA             | I, II, III, IV, VIII    | NA                 | NA               |
| Node 2                     | Primates plus Dermoptera | 0 - 1          | I, II, III, VIII        | -                  | IV               |
| Node 3                     | Euprimates               | 1 - 0          | I, II, III, VIII        | V                  | -                |
| Node 4                     | Haplorrhini              | 0 - 2          | I, III, V               | -                  | II, VIII         |
| Node 5                     | Anthropoidea             | 0 - 1          | III, V                  | -                  | I                |
| Node 6                     | Hominoidea               | 0 - 1          | III                     | -                  | V                |
| <i>N. leucogenys</i>       | white-cheeked gibbon     | 1 - 1          | -                       | VII                | V                |
| Node 7                     | Strepsirrhini            | 1 - 0          | I, II, III, V, VIII     | VI                 | -                |
| Node 8                     | Lemuriformes             | 1 - 0          | I, II, III, V, VI, VIII | IV                 | -                |
| <i>D. madagascariensis</i> | aye-aye                  | 1 - 3          | III, VI, VIII           | IX                 | I, II, V         |
| Node 9                     | Lemuridae                | 0 - 1          | I, II, III, V, VI       | -                  | VIII             |
| Node 10                    | <i>Eulemur</i>           | 1 - 0          | I, II, III, V, VI       | VII                | -                |
| Node 11                    | Cheirogaleidae           | 3 - 0          | I, II, III, V, VI, VIII | IV, VII, IX        | -                |

988

989 Note - Node numbers correspond to Figure 1. Gains and losses cannot be evaluated for Node 1  
 990 because it is the root node of the species tree.

991
